# Supplementary material for: Randomised trial of stable chest pain investigation: 3-year clinical and quality of life results from CE-MARC 2
Source: HighWire-hosted journal article supplement (doi:10.1136/openhrt-2022-002221), 2023-05-01
Supplement: openhrt-2022-002221supp001_data_supplement.pdf [file openhrt-2022-002221supp001_data_supplement.pdf]

## Supplementary Appendix

### Randomised trial of stable chest pain investigation (CE-MARC 2): 3-year clinical and quality of life results

#### Content

Questionnaire choice, validation and reliability

Supplemental Appendix A: Questionnaire completion.

Supplemental Appendix B: Supplemental results for Seattle Angina Questionnaire (UK) analyses.

Supplemental Appendix C: Supplemental results for SF12v2 analyses.

Supplemental Appendix D: Supplemental results for EuroQol EQ-5D analyses.

Supplemental Appendix E: Unadjusted and Adjusted Hazard Ratios, with full regression model results

### **Questionnaire choice, validation and reliability**

Patient-reported QoL was measured using the Seattle Angina Questionnaire (SAQ) UK English,(1) the SF12v2 (2) and the Euroqol EQ-5D-3L (3) and -5L (4) at randomisation, 6 months, 1 year, 2 years and 3 years. The validity and reliability of the 19-item SAQ (1,5), the SF12 (6) and the EQ-5D (7,8) has been previously demonstrated in cardiovascular studies

### **References:**

1. Spertus JA, Winder JA, Dewhurst TA et al. Development and evaluation of the Seattle Angina questionnaire: A new functional status measure for coronary artery disease. *Journal of the American College of Cardiology* 1995;25:333-341.
2. Ware JE, Kosinski M, Keller SD. A 12-Item Short-Form Health Survey: Construction of Scales and Preliminary Tests of Reliability and Validity. *Medical Care* 1996;34:220-233.
3. The EuroQol Health Policy Group. EuroQol-a new facility for the measurement of health-related quality of life. 1990;16:199-208.
4. Herdman M, Gudex C, Lloyd A et al. Development and preliminary testing of the new five-level version of EQ-5D (EQ-5D-5L). 2011;20:1727-1736.
5. Patel KK, Arnold SV, Chan PS et al. Validation of the Seattle angina questionnaire in women with ischemic heart disease. *American Heart Journal* 2018;201:117-123.
6. Failde I, Medina P, Ramirez C, Arana R. Construct and criterion validity of the SF-12 health questionnaire in patients with acute myocardial infarction and unstable angina. *Journal of Evaluation in Clinical Practice* 2010;16:569-573.
7. Wu J, Han YR, Zhao FL, Zhou J, Chen ZJ, Sun H. Validation and comparison of EuroQoL-5 dimension (EQ-5D) and Short Form-6 dimension (SF-6D) among stable angina patients. *Health and Quality of Life Outcomes* 2014;12.
8. Golicki D, Niewada M, Buczek J et al. Validity of EQ-5D-5L in stroke. *Quality of Life Research* 2015;24:845-850.

## Supplemental Appendix A:

Tables provide the unadjusted and adjusted hazard ratios for time to first Major Adverse Cardiovascular Event (MACE) for the NICE vs CMR comparison, and for the SPECT vs CMR comparison. For the multivariable models, the full model fits with adjusted hazard ratios are given, except where estimation is not feasible due to small numbers. Categorical prognostic factors with 3 or more levels do not include P-Values for each level, rather the overall effect.

In all tables, a hazard ratio greater than 1 indicates increased risk of having a MACE (or experiencing MACE sooner) compared to the reference category level.

Table A.1: Unadjusted univariable hazard ratios for MACE for covariates in all 1,202 participants

| Effect                                        | Hazard Ratio (95% CI)                         | P-Value |
|-----------------------------------------------|-----------------------------------------------|---------|
| Randomising Centre                            | Likelihood Ratio Chi-Sq: $X^2$ (5 df) = 1.612 | 0.900   |
| Sex (MALE vs Female)                          | 0.90 (0.49 to 1.64)                           | 0.721   |
| Age Group (65Y OR OLDER vs Under 65)          | 1.48 (0.75 to 2.95)                           | 0.278   |
| Pre-Test Likelihood category (Overall Effect) | Likelihood Ratio Chi-Sq: $X^2$ (4 df) = 6.427 | 0.169   |
| Hypertension (YES vs No)                      | 2.21 (1.20 to 4.07)                           | 0.011   |
| Smoking Status (Overall effect)               | Likelihood Ratio Chi-Sq: $X^2$ (2 df) = 4.745 | 0.093   |
| Ethnicity (NON-WHITE vs White)                | 1.25 (0.45 to 3.50)                           | 0.682   |
| Type II Diabetes (YES vs No+T1)               | 1.64 (0.73 to 3.70)                           | 0.257   |
| Body Mass Index (per kg/m <sup>2</sup> )      | 1.01 (0.96 to 1.07)                           | 0.682   |

Note: all covariates except Type II diabetes and Body Mass Index were pre-specified as being included in the analysis Type II diabetes and Body Mass Index are post hoc analyses presented in response to manuscript review and are not included in subsequent tables. Note the adjustment for PTL category includes adjustment for the effect of diabetes on outcome.

Table A.2: Univariable and Full Model Fit results for comparison of NICE CG95 (2010) vs CMR (NICE and CMR participants only)

| Effect                                        | Hazard Ratio (95% CI)                                | P-Value   |
|-----------------------------------------------|------------------------------------------------------|-----------|
| <b>Univariable: Unadjusted</b>                |                                                      |           |
| NICE CG95 (2010) vs 3T-CMR                    | 0.66 (0.26, 1.67)                                    | P=0.38    |
| <b>Multivariable: Adjusted</b>                |                                                      |           |
| NICE CG95 (2010) vs 3T-CMR                    | 0.61 (0.24, 1.56)                                    | P = 0.303 |
| Randomising Centre (Overall effect)           | Likelihood Ratio Chi-Sq: X <sup>2</sup> (5df) = 6.93 | P = 0.226 |
| Sex: MALE vs Female                           | 0.51 (0.20, 1.28)                                    | P = 0.151 |
| Age Group: 65Y OR OLDER vs Under 65           | 1.38 (0.47, 4.09)                                    | P = 0.557 |
| Pre-test Likelihood category (Overall effect) | Likelihood Ratio Chi-Sq: X <sup>2</sup> (4df) = 6.25 | P = 0.181 |
| PTL: 0-9% vs 10-29%                           | -                                                    |           |
| PTL: 30-60% vs 10-29%                         | 4.32 (0.92, 20.30)                                   |           |
| PTL: 61-90% vs 10-29%                         | 4.01 (0.77, 20.94)                                   |           |
| PTL: 91-100% vs 10-29%                        | -                                                    |           |
| Hypertension: YES vs No                       | 2.38 (1.00, 5.68)                                    | P = 0.051 |
| Smoking Status (Overall effect)               | Likelihood Ratio Chi-Sq: X <sup>2</sup> (2df) = 4.19 | P = 0.123 |
| Smoking status: EX vs Never                   | 1.48 (0.50, 4.35)                                    |           |
| Smoking status: CURRENT vs Never              | 2.95 (1.01, 8.58)                                    |           |
| Ethnicity: NON-WHITE vs White                 | 2.49 (0.60, 10.27)                                   | P = 0.208 |

Table A.3: Univariable and Full Model Fit results for comparison of CMR vs SPECT (CMR and SPECT participants only)

| Effect                                        | Hazard Ratio (95% CI)                                | P-Value   |
|-----------------------------------------------|------------------------------------------------------|-----------|
| <b>Univariable: Unadjusted</b>                |                                                      |           |
| SPECT vs 3T-CMR                               | 1.00 (0.52, 1.92)                                    | P=1.00    |
| <b>Multivariable: Unadjusted</b>              |                                                      |           |
| 3T-CMR vs SPECT                               | 1.03 (0.54, 1.98)                                    | P = 0.928 |
| Randomising Centre (Overall effect)           | Likelihood Ratio Chi-Sq: X <sup>2</sup> (5df) = 0.47 | P = 0.993 |
| Sex: MALE vs Female                           | 0.80 (0.36, 1.78)                                    | P = 0.593 |
| Age Group: 65Y OR OLDER vs Under 65           | 1.32 (0.54, 3.22)                                    | P = 0.547 |
| Pre-test Likelihood category (Overall effect) | Likelihood Ratio Chi-Sq: X <sup>2</sup> (4df) = 3.38 | P = 0.496 |
| PTL: 0-9% vs 10-29%                           | -                                                    |           |
| PTL: 30-60% vs 10-29%                         | 1.24 (0.44, 3.55)                                    |           |
| PTL: 61-90% vs 10-29%                         | 2.32 (0.79, 6.80)                                    |           |
| PTL: 91-100% vs 10-29%                        | 1.43 (0.16, 13.11)                                   |           |
| Hypertension: YES vs No                       | 2.20 (1.11, 4.38)                                    | P = 0.025 |
| Smoking Status (Overall effect)               | Likelihood Ratio Chi-Sq: X <sup>2</sup> (2df) = 4.95 | P = 0.084 |
| Smoking status: EX vs Never                   | 1.98 (0.87, 4.53)                                    |           |
| Smoking status: CURRENT vs Never              | 2.62 (1.04, 6.59)                                    |           |
| Ethnicity: NON-WHITE vs White                 | 1.69 (0.55, 5.15)                                    | P = 0.356 |

## Appendix B: Completion of questionnaires

Table B.1 Returned questionnaire booklets

|                  | 3T CMR-Guided Care (n=481) | SPECT-Guided Care (n=481) | NICE CG95 (2010) (n=240) | Total (n=1202) |
|------------------|----------------------------|---------------------------|--------------------------|----------------|
| <b>Baseline</b>  |                            |                           |                          |                |
| Not completed    | 3 (0.6%)                   | 2 (0.4%)                  | 4 (1.7%)                 | 9 (0.7%)       |
| In clinic        | 472 (98.1%)                | 474 (98.5%)               | 233 (97.1%)              | 1179 (98.1%)   |
| Home (Postal)    | 2 (0.4%)                   | 4 (0.8%)                  | 2 (0.8%)                 | 8 (0.7%)       |
| Home (Telephone) | 4 (0.8%)                   | 1 (0.2%)                  | 1 (0.4%)                 | 6 (0.5%)       |
| <b>6 months</b>  |                            |                           |                          |                |
| Not completed    | 133 (27.7%)                | 144 (29.9%)               | 60 (25.0%)               | 337 (28.0%)    |
| In clinic        | 1 (0.2%)                   | 2 (0.4%)                  | -                        | 3 (0.2%)       |
| Home (Postal)    | 343 (71.3%)                | 326 (67.8%)               | 177 (73.8%)              | 846 (70.4%)    |
| Home (Telephone) | 4 (0.8%)                   | 9 (1.9%)                  | 3 (1.3%)                 | 16 (1.3%)      |
| <b>12 months</b> |                            |                           |                          |                |
| Not completed    | 149 (31.0%)                | 180 (37.4%)               | 82 (34.2%)               | 411 (34.2%)    |
| In clinic        | 1 (0.2%)                   | 1 (0.2%)                  | -                        | 2 (0.2%)       |
| Home (Postal)    | 323 (67.2%)                | 292 (60.7%)               | 155 (64.6%)              | 770 (64.1%)    |
| Home (Telephone) | 8 (1.7%)                   | 8 (1.7%)                  | 3 (1.3%)                 | 19 (1.6%)      |
| <b>24 months</b> |                            |                           |                          |                |
| Not completed    | 171 (35.6%)                | 197 (41.0%)               | 94 (39.2%)               | 462 (38.4%)    |
| In clinic        | 2 (0.4%)                   | 1 (0.2%)                  | -                        | 3 (0.2%)       |
| Home (Postal)    | 305 (63.4%)                | 279 (58.0%)               | 144 (60.0%)              | 728 (60.6%)    |
| Home (Telephone) | 3 (0.6%)                   | 4 (0.8%)                  | 2 (0.8%)                 | 9 (0.7%)       |
| <b>36 months</b> |                            |                           |                          |                |
| Not completed    | 199 (41.4%)                | 231 (48.0%)               | 102 (42.5%)              | 532 (44.3%)    |
| In clinic        | 2 (0.4%)                   | -                         | -                        | 2 (0.2%)       |
| Home (Postal)    | 280 (58.2%)                | 250 (52.0%)               | 138 (57.5%)              | 668 (55.6%)    |

NB: "Completed" refers to a questionnaire booklet returned to the trial team, regardless of how complete each item, scale or questionnaire.

## Appendix C: Supplementary analyses of the Seattle Angina Questionnaire (SAQ-UK)

Table C.1: Overall distribution of observed SAQ-UK scale values, and frequency of floor/ceiling values at baseline, 12 and 36months follow-up. (Ranges 0=worst health, 100=best health)

|                              | 3T CMR-Guided Care (n=481) | SPECT-Guided Care (n=481) | NICE CG95 (2010) (n=240) | Total (n=1202)           |
|------------------------------|----------------------------|---------------------------|--------------------------|--------------------------|
| <b>Angina Frequency (AF)</b> |                            |                           |                          |                          |
| <b>Baseline</b>              |                            |                           |                          |                          |
| n                            | 476                        | 477                       | 234                      | 1187                     |
| Mean (SD)                    | 65.2 (23.88)               | 66.2 (22.71)              | 66.2 (22.17)             | 65.8 (23.07)             |
| Median (Interquartile Range) | 70 ( 50 to 80 )            | 70 ( 60 to 80 )           | 70 ( 50 to 80 )          | 70 ( 50 to 80 )          |
| n (%) Min, Max value         | 9 (1.9%), 33 (6.9%)        | 3 (0.6%), 34 (7.1%)       | 2 (0.9%), 16 (6.8%)      | 14 (1.2%), 83 (7.0%)     |
| <b>12 months</b>             |                            |                           |                          |                          |
| n                            | 325                        | 295                       | 157                      | 777                      |
| Mean (SD)                    | 88.4 (19.62)               | 88.6 (16.33)              | 85.4 (21.05)             | 87.9 (18.77)             |
| Median (Interquartile Range) | 100 ( 80 to 100 )          | 100 ( 80 to 100 )         | 100 ( 80 to 100 )        | 100 ( 80 to 100 )        |
| n (%) Min, Max value         | 1 (0.3%), 197 (60.6%)      | 1 (0.3%), 149 (50.5%)     | 1 (0.6%), 79 (50.3%)     | 3 (0.4%), 425 (54.7%)    |
| <b>36 months</b>             |                            |                           |                          |                          |
| n                            | 276                        | 247                       | 132                      | 655                      |
| Mean (SD)                    | 90.4 (16.77)               | 91.0 (14.43)              | 86.1 (22.67)             | 89.8 (17.41)             |
| Median (Interquartile Range) | 100 ( 90 to 100 )          | 100 ( 80 to 100 )         | 100 ( 80 to 100 )        | 100 ( 80 to 100 )        |
| n (%) Min, Max value         | 0 (0.0%), 179 (64.9%)      | 0 (0.0%), 149 (60.3%)     | 1 (0.8%), 79 (59.8%)     | 1 (0.2%), 407 (62.1%)    |
| <b>Angina Stability (AS)</b> |                            |                           |                          |                          |
| <b>Baseline</b>              |                            |                           |                          |                          |
| n                            | 469                        | 468                       | 232                      | 1169                     |
| Mean (SD)                    | 45.9 (27.87)               | 45.5 (26.01)              | 43.5 (28.13)             | 45.3 (27.19)             |
| Median (Interquartile Range) | 50 ( 25 to 50 )            | 50 ( 25 to 50 )           | 50 ( 25 to 50 )          | 50 ( 25 to 50 )          |
| n (%) Min, Max value         | 61 (13.0%), 53 (11.3%)     | 48 (10.3%), 44 (9.4%)     | 33 (14.2%), 26 (11.2%)   | 142 (12.1%), 123 (10.5%) |
| <b>12 months</b>             |                            |                           |                          |                          |
| n                            | 322                        | 296                       | 157                      | 775                      |
| Mean (SD)                    | 53.1 (18.57)               | 59.3 (20.74)              | 53.3 (20.04)             | 55.5 (19.92)             |
| Median (Interquartile Range) | 50 ( 50 to 50 )            | 50 ( 50 to 75 )           | 50 ( 50 to 50 )          | 50 ( 50 to 50 )          |
| n (%) Min, Max value         | 8 (2.5%), 29 (9.0%)        | 4 (1.4%), 49 (16.6%)      | 5 (3.2%), 17 (10.8%)     | 17 (2.2%), 95 (12.3%)    |

|                                 | 3T CMR-Guided Care (n=481) | SPECT-Guided Care (n=481) | NICE CG95 (2010) (n=240) | Total (n=1202)        |
|---------------------------------|----------------------------|---------------------------|--------------------------|-----------------------|
| <b>36 months</b>                |                            |                           |                          |                       |
| n                               | 275                        | 246                       | 132                      | 653                   |
| Mean (SD)                       | 53.9 (17.63)               | 55.1 (19.94)              | 50.0 (16.35)             | 53.6 (18.36)          |
| Median (Interquartile Range)    | 50 ( 50 to 50 )            | 50 ( 50 to 50 )           | 50 ( 50 to 50 )          | 50 ( 50 to 50 )       |
| n (%) Min, Max value            | 3 (1.1%), 27 (9.8%)        | 4 (1.6%), 30 (12.2%)      | 2 (1.5%), 7 (5.3%)       | 9 (1.4%), 64 (9.8%)   |
| <b>Physical Limitation (PL)</b> |                            |                           |                          |                       |
| <b>Baseline</b>                 |                            |                           |                          |                       |
| n                               | 463                        | 464                       | 230                      | 1157                  |
| Mean (SD)                       | 72.9 (22.33)               | 72.0 (21.83)              | 71.2 (24.00)             | 72.2 (22.46)          |
| Median (Interquartile Range)    | 77.8 ( 58.3 to 91.7 )      | 75 ( 58.3 to 88.9 )       | 77.8 ( 55.6 to 88.9 )    | 77.8 ( 58.3 to 91.7 ) |
| n (%) Min, Max value            | 0 (0.0%), 57 (12.3%)       | 0 (0.0%), 44 (9.5%)       | 1 (0.4%), 24 (10.4%)     | 1 (0.1%), 125 (10.8%) |
| <b>12 months</b>                |                            |                           |                          |                       |
| n                               | 292                        | 271                       | 150                      | 713                   |
| Mean (SD)                       | 79.8 (23.28)               | 79.7 (22.91)              | 74.0 (26.00)             | 78.5 (23.82)          |
| Median (Interquartile Range)    | 88.9 ( 66.7 to 100 )       | 87.5 ( 66.7 to 100 )      | 83.3 ( 55.6 to 97.2 )    | 86.1 ( 66.7 to 100 )  |
| n (%) Min, Max value            | 1 (0.3%), 94 (32.2%)       | 2 (0.7%), 84 (31.0%)      | 0 (0.0%), 33 (22.0%)     | 3 (0.4%), 211 (29.6%) |
| <b>36 months</b>                |                            |                           |                          |                       |
| n                               | 256                        | 228                       | 126                      | 610                   |
| Mean (SD)                       | 79.9 (24.00)               | 80.0 (23.63)              | 72.0 (28.81)             | 78.3 (25.10)          |
| Median (Interquartile Range)    | 89.6 ( 63.9 to 100 )       | 88.9 ( 66.7 to 100 )      | 83.3 ( 47.2 to 100 )     | 88.9 ( 61.1 to 100 )  |
| n (%) Min, Max value            | 0 (0.0%), 92 (35.9%)       | 0 (0.0%), 71 (31.1%)      | 1 (0.8%), 36 (28.6%)     | 1 (0.2%), 199 (32.6%) |
| <b>Quality of Life (QoL)</b>    |                            |                           |                          |                       |
| <b>Baseline</b>                 |                            |                           |                          |                       |
| n                               | 474                        | 475                       | 234                      | 1183                  |
| Mean (SD)                       | 52.7 (20.76)               | 51.4 (20.01)              | 49.0 (21.33)             | 51.4 (20.60)          |
| Median (Interquartile Range)    | 50 ( 41.7 to 66.7 )        | 50 ( 41.7 to 66.7 )       | 50 ( 33.3 to 66.7 )      | 50 ( 37.5 to 66.7 )   |
| n (%) Min, Max value            | 4 (0.8%), 11 (2.3%)        | 2 (0.4%), 5 (1.1%)        | 3 (1.3%), 5 (2.1%)       | 9 (0.8%), 21 (1.8%)   |
| <b>12 months</b>                |                            |                           |                          |                       |
| n                               | 320                        | 292                       | 155                      | 767                   |
| Mean (SD)                       | 73.6 (23.77)               | 72.9 (20.98)              | 69.2 (27.07)             | 72.5 (23.51)          |
| Median (Interquartile Range)    | 83.3 ( 58.3 to 91.7 )      | 75 ( 58.3 to 91.7 )       | 75 ( 50 to 91.7 )        | 75 ( 58.3 to 91.7 )   |
| n (%) Min, Max value            | 3 (0.9%), 57 (17.8%)       | 0 (0.0%), 40 (13.7%)      | 2 (1.3%), 30 (19.4%)     | 5 (0.7%), 127 (16.6%) |



|                                    | 3T CMR-Guided Care (n=481) | SPECT-Guided Care (n=481) | NICE CG95 (2010) (n=240) | Total (n=1202)        |
|------------------------------------|----------------------------|---------------------------|--------------------------|-----------------------|
| <b>36 months</b>                   |                            |                           |                          |                       |
| n                                  | 268                        | 243                       | 127                      | 638                   |
| Mean (SD)                          | 76.0 (22.69)               | 76.3 (21.03)              | 71.7 (25.33)             | 75.3 (22.67)          |
| Median (Interquartile Range)       | 83.3 ( 58.3 to 91.7 )      | 83.3 ( 66.7 to 91.7 )     | 83.3 ( 58.3 to 91.7 )    | 83.3 ( 58.3 to 91.7 ) |
| n (%) Min, Max value               | 0 (0.0%), 61 (22.8%)       | 1 (0.4%), 41 (16.9%)      | 1 (0.8%), 23 (18.1%)     | 2 (0.3%), 125 (19.6%) |
| <b>Treatment Satisfaction (TS)</b> |                            |                           |                          |                       |
| <b>Baseline</b>                    |                            |                           |                          |                       |
| n                                  | 471                        | 472                       | 233                      | 1176                  |
| Mean (SD)                          | 90.6 (12.99)               | 90.0 (14.61)              | 89.9 (13.40)             | 90.2 (13.74)          |
| Median (Interquartile Range)       | 100 ( 81.3 to 100 )        | 100 ( 81.3 to 100 )       | 93.8 ( 81.3 to 100 )     | 100 ( 81.3 to 100 )   |
| n (%) Min, Max value               | 0 (0.0%), 244 (51.8%)      | 0 (0.0%), 250 (53.0%)     | 0 (0.0%), 113 (48.5%)    | 0 (0.0%), 607 (51.6%) |
| <b>12 months</b>                   |                            |                           |                          |                       |
| n                                  | 322                        | 292                       | 155                      | 769                   |
| Mean (SD)                          | 87.2 (19.91)               | 86.1 (18.29)              | 85.6 (19.65)             | 86.5 (19.24)          |
| Median (Interquartile Range)       | 100 ( 81.3 to 100 )        | 93.8 ( 81.3 to 100 )      | 93.8 ( 81.3 to 100 )     | 100 ( 81.3 to 100 )   |
| n (%) Min, Max value               | 1 (0.3%), 179 (55.6%)      | 0 (0.0%), 134 (45.9%)     | 0 (0.0%), 73 (47.1%)     | 1 (0.1%), 386 (50.2%) |
| <b>36 months</b>                   |                            |                           |                          |                       |
| n                                  | 269                        | 242                       | 129                      | 640                   |
| Mean (SD)                          | 88.6 (20.30)               | 89.4 (16.92)              | 86.7 (19.97)             | 88.5 (19.01)          |
| Median (Interquartile Range)       | 100 ( 81.3 to 100 )        | 100 ( 81.3 to 100 )       | 100 ( 81.3 to 100 )      | 100 ( 81.3 to 100 )   |
| n (%) Min, Max value               | 2 (0.7%), 169 (62.8%)      | 0 (0.0%), 137 (56.6%)     | 0 (0.0%), 71 (55.0%)     | 2 (0.3%), 377 (58.9%) |

Table C2: Comparison of primary and sensitivity mixed effects (random coefficients) modelling of SAQ domains

| Domain / Analysis             | CG95 (2010) vs CMR |                |        |        | SPECT vs CMR |                |        |       |
|-------------------------------|--------------------|----------------|--------|--------|--------------|----------------|--------|-------|
|                               | Estimate           | Standard Error | 95% CI |        | Estimate     | Standard Error | 95% CI |       |
|                               |                    |                | Lower  | Upper  |              |                | Lower  | Upper |
| <b>Angina Frequency</b>       |                    |                |        |        |              |                |        |       |
| Primary                       | -0.023             | 0.056          | -0.133 | 0.087  | 0.002        | 0.044          | -0.084 | 0.088 |
| Baseline*Time                 | -0.024             | 0.056          | -0.134 | 0.086  | 0.002        | 0.044          | -0.084 | 0.088 |
| Multiple Imputation           | -0.048             | 0.060          | -0.167 | 0.071  | 0.022        | 0.049          | -0.075 | 0.119 |
| <b>Angina Stability</b>       |                    |                |        |        |              |                |        |       |
| Primary                       | -0.224             | 0.077          | -0.376 | -0.073 | -0.080       | 0.064          | -0.206 | 0.046 |
| Baseline*Time                 | -0.224             | 0.077          | -0.376 | -0.073 | -0.080       | 0.064          | -0.206 | 0.046 |
| Multiple Imputation           | -0.191             | 0.072          | -0.332 | -0.049 | -0.067       | 0.060          | -0.184 | 0.051 |
| Proportional Odds             | -0.030             | 0.010          | -0.050 | -0.010 | -0.010       | 0.009          | -0.027 | 0.007 |
| <b>Physical Limitation</b>    |                    |                |        |        |              |                |        |       |
| Primary                       | -0.072             | 0.055          | -0.180 | 0.036  | 0.035        | 0.045          | -0.054 | 0.124 |
| Baseline*Time                 | -0.072             | 0.055          | -0.180 | 0.036  | 0.034        | 0.045          | -0.055 | 0.123 |
| Multiple Imputation           | -0.048             | 0.061          | -0.169 | 0.072  | 0.037        | 0.049          | -0.060 | 0.134 |
| <b>Quality of Life</b>        |                    |                |        |        |              |                |        |       |
| Primary                       | -0.053             | 0.068          | -0.187 | 0.081  | -0.004       | 0.054          | -0.110 | 0.102 |
| Baseline*Time                 | -0.065             | 0.068          | -0.198 | 0.068  | -0.014       | 0.054          | -0.120 | 0.091 |
| Multiple Imputation           | -0.043             | 0.071          | -0.183 | 0.097  | 0.004        | 0.056          | -0.107 | 0.114 |
| <b>Treatment Satisfaction</b> |                    |                |        |        |              |                |        |       |
| Primary                       | 0.010              | 0.060          | -0.108 | 0.128  | 0.106        | 0.048          | 0.012  | 0.200 |
| Baseline*Time                 | 0.008              | 0.060          | -0.109 | 0.125  | 0.100        | 0.048          | 0.006  | 0.193 |
| Multiple Imputation           | 0.027              | 0.063          | -0.097 | 0.150  | 0.100        | 0.049          | 0.003  | 0.196 |

Estimate=Estimated interaction effect between NICE (or SPECT) and time in months. Negative values indicate CMR improving vs comparator, positive values indicate comparator improving vs CMR.

Lower/Upper = Limits of 95% Confidence Interval for the difference

Baseline\*Time=Fitting the primary analysis model, with an additional fixed interaction effect for baseline-by-time, allowing patients with different health statuses to have different trajectories during the follow-up.

Proportional Odds=Replacing linear mixed model with an ordinal proportional odds model, modelling the odds of moving up to greater values. Only done for the Angina Stability scale, derived from a single 5-item question. Values <0 represent reduced log-odds per month of moving to higher scores for CG95/SPECT vs CMR, values >0 represent increased log-odds per month of moving up to higher scores vs CMR. Thus the estimate of -0.0301 for Angina Stability in the NICE comparison indicates that the odds of a NICE patient having a higher Angina Stability score change by  $\exp(-0.0301) - 1 = -2.97\%$  per month compared to the CMR arm.

Table C3: Comparison of primary and sensitivity analyses of SAQ domains at 12 and 36 months post-randomisation

| Domain / randomised arm | Time      | Analysis     | Least-Squares Means |          |        |        | Least Squares Mean differences vs CMR |          |        |        |
|-------------------------|-----------|--------------|---------------------|----------|--------|--------|---------------------------------------|----------|--------|--------|
|                         |           |              | Est.                | Std Err. | 95% CI |        | Est.                                  | Std Err. | 95% CI |        |
|                         |           |              |                     |          | Lower  | Upper  |                                       |          | Lower  | Upper  |
| <b>Angina Frequency</b> |           |              |                     |          |        |        |                                       |          |        |        |
| CMR (n=325)             | 12 months | Primary      | 89.823              | 1.310    | 87.253 | 92.394 |                                       |          |        |        |
|                         |           | BL*Time      | 89.239              | 1.307    | 86.674 | 91.805 |                                       |          |        |        |
|                         |           | Mult. Imput. | 90.249              | 1.811    | 86.698 | 93.800 |                                       |          |        |        |
| SPECT (n=295)           | 12 months | Primary      | 88.202              | 1.320    | 85.612 | 90.793 | -1.621                                | 1.404    | -4.377 | 1.134  |
|                         |           | BL*Time      | 87.689              | 1.317    | 85.105 | 90.274 | -1.550                                | 1.405    | -4.308 | 1.208  |
|                         |           | Mult. Imput. | 88.721              | 1.756    | 85.278 | 92.164 | -1.528                                | 1.371    | -4.219 | 1.163  |
| CG95 (2010) (n=157)     | 12 months | Primary      | 86.612              | 1.652    | 83.370 | 89.855 | -3.211                                | 1.701    | -6.550 | 0.128  |
|                         |           | BL*Time      | 86.045              | 1.646    | 82.814 | 89.276 | -3.195                                | 1.703    | -6.536 | 0.147  |
|                         |           | Mult. Imput. | 86.700              | 2.097    | 82.587 | 90.813 | -3.549                                | 1.698    | -6.882 | -0.215 |
| CMR (n=276)             | 36 months | Primary      | 90.742              | 1.314    | 88.164 | 93.321 |                                       |          |        |        |
|                         |           | BL*Time      | 90.179              | 1.312    | 87.604 | 92.754 |                                       |          |        |        |
|                         |           | Mult. Imput. | 91.016              | 1.798    | 87.491 | 94.542 |                                       |          |        |        |
| SPECT (n=247)           | 36 months | Primary      | 90.437              | 1.330    | 87.827 | 93.047 | -0.305                                | 1.416    | -3.083 | 2.473  |
|                         |           | BL*Time      | 89.977              | 1.328    | 87.372 | 92.582 | -0.202                                | 1.412    | -2.973 | 2.569  |
|                         |           | Mult. Imput. | 91.266              | 1.808    | 87.721 | 94.811 | 0.250                                 | 1.434    | -2.568 | 3.068  |
| CG95 (2010) (n=132)     | 36 months | Primary      | 86.488              | 1.661    | 83.229 | 89.747 | -4.254                                | 1.715    | -7.619 | -0.889 |
|                         |           | BL*Time      | 85.960              | 1.653    | 82.715 | 89.204 | -4.219                                | 1.710    | -7.575 | -0.863 |
|                         |           | Mult. Imput. | 85.999              | 2.248    | 81.583 | 90.415 | -5.017                                | 1.802    | -8.560 | -1.474 |
| <b>Angina Stability</b> |           |              |                     |          |        |        |                                       |          |        |        |
| CMR (n=322)             | 12 months | Primary      | 53.023              | 1.338    | 50.396 | 55.649 |                                       |          |        |        |
|                         |           | BL*Time      | 53.293              | 1.339    | 50.665 | 55.922 |                                       |          |        |        |
|                         |           | Mult. Imput. | 55.108              | 1.714    | 51.744 | 58.473 |                                       |          |        |        |
| SPECT (n=296)           | 12 months | Primary      | 58.556              | 1.357    | 55.894 | 61.219 | 5.534                                 | 1.582    | 2.428  | 8.639  |
|                         |           | BL*Time      | 58.787              | 1.357    | 56.123 | 61.451 | 5.494                                 | 1.583    | 2.388  | 8.600  |
|                         |           | Mult. Imput. | 60.101              | 1.828    | 56.509 | 63.692 | 4.992                                 | 1.563    | 1.923  | 8.062  |
| CG95 (2010) (n=157)     | 12 months | Primary      | 53.456              | 1.747    | 50.029 | 56.884 | 0.434                                 | 1.914    | -3.322 | 4.190  |
|                         |           | BL*Time      | 53.702              | 1.746    | 50.276 | 57.128 | 0.409                                 | 1.914    | -3.349 | 4.166  |

| Domain / randomised arm    | Time      | Analysis     | Least-Squares Means |          |        |        | Least Squares Mean differences vs CMR |          |         |        |
|----------------------------|-----------|--------------|---------------------|----------|--------|--------|---------------------------------------|----------|---------|--------|
|                            |           |              | Est.                | Std Err. | 95% CI |        | Est.                                  | Std Err. | 95% CI  |        |
|                            |           |              |                     |          | Lower  | Upper  |                                       |          | Lower   | Upper  |
| CMR (n=275)                | 36 months | Mult. Imput. | 55.479              | 2.083    | 51.388 | 59.571 | 0.371                                 | 1.992    | -3.544  | 4.286  |
|                            |           | Primary      | 53.344              | 1.345    | 50.704 | 55.984 |                                       |          |         |        |
|                            |           | BL*Time      | 53.647              | 1.351    | 50.997 | 56.298 |                                       |          |         |        |
| SPECT (n=246)              | 36 months | Mult. Imput. | 54.941              | 1.671    | 51.662 | 58.221 |                                       |          |         |        |
|                            |           | Primary      | 54.789              | 1.380    | 52.081 | 57.497 | 1.446                                 | 1.602    | -1.699  | 4.590  |
|                            |           | BL*Time      | 55.033              | 1.386    | 52.313 | 57.754 | 1.386                                 | 1.602    | -1.759  | 4.530  |
| CG95 (2010) (n=132)        | 36 months | Mult. Imput. | 56.069              | 1.759    | 52.613 | 59.525 | 1.128                                 | 1.490    | -1.802  | 4.058  |
|                            |           | Primary      | 49.641              | 1.763    | 46.181 | 53.100 | -3.703                                | 1.933    | -7.497  | 0.091  |
|                            |           | BL*Time      | 49.892              | 1.765    | 46.429 | 53.356 | -3.755                                | 1.934    | -7.550  | 0.040  |
|                            |           | Mult. Imput. | 51.677              | 1.991    | 47.767 | 55.588 | -3.264                                | 1.806    | -6.814  | 0.286  |
| <b>Physical Limitation</b> |           |              |                     |          |        |        |                                       |          |         |        |
| CMR (n=292)                | 12 months | Primary      | 78.276              | 1.483    | 75.365 | 81.186 |                                       |          |         |        |
|                            |           | BL*Time      | 79.672              | 1.475    | 76.778 | 82.566 |                                       |          |         |        |
|                            |           | Mult. Imput. | 79.392              | 2.091    | 75.289 | 83.494 |                                       |          |         |        |
| SPECT (n=271)              | 12 months | Primary      | 78.093              | 1.488    | 75.173 | 81.014 | -0.182                                | 1.558    | -3.239  | 2.875  |
|                            |           | BL*Time      | 79.244              | 1.476    | 76.348 | 82.140 | -0.428                                | 1.553    | -3.476  | 2.620  |
|                            |           | Mult. Imput. | 78.726              | 2.052    | 74.701 | 82.751 | -0.665                                | 1.501    | -3.611  | 2.280  |
| CG95 (2010) (n=150)        | 12 months | Primary      | 72.073              | 1.837    | 68.467 | 75.679 | -6.202                                | 1.872    | -9.876  | -2.529 |
|                            |           | BL*Time      | 73.377              | 1.823    | 69.799 | 76.955 | -6.296                                | 1.865    | -9.955  | -2.636 |
|                            |           | Mult. Imput. | 72.797              | 2.365    | 68.157 | 77.437 | -6.595                                | 1.812    | -10.151 | -3.038 |
| CMR (n=256)                | 36 months | Primary      | 77.136              | 1.528    | 74.137 | 80.135 |                                       |          |         |        |
|                            |           | BL*Time      | 78.389              | 1.525    | 75.397 | 81.381 |                                       |          |         |        |
|                            |           | Mult. Imput. | 77.396              | 2.156    | 73.164 | 81.628 |                                       |          |         |        |
| SPECT (n=228)              | 36 months | Primary      | 78.353              | 1.547    | 75.317 | 81.388 | 1.217                                 | 1.655    | -2.032  | 4.466  |
|                            |           | BL*Time      | 79.469              | 1.539    | 76.449 | 82.488 | 1.079                                 | 1.654    | -2.166  | 4.325  |
|                            |           | Mult. Imput. | 78.337              | 2.179    | 74.059 | 82.614 | 0.941                                 | 1.591    | -2.185  | 4.068  |
| CG95 (2010) (n=126)        | 36 months | Primary      | 70.453              | 1.923    | 66.679 | 74.227 | -6.683                                | 1.991    | -10.590 | -2.776 |
|                            |           | BL*Time      | 71.706              | 1.913    | 67.951 | 75.461 | -6.683                                | 1.988    | -10.585 | -2.782 |
|                            |           | Mult. Imput. | 70.940              | 2.401    | 66.228 | 75.653 | -6.455                                | 1.941    | -10.269 | -2.641 |
| <b>Quality of Life</b>     |           |              |                     |          |        |        |                                       |          |         |        |

| Domain / randomised arm       | Time      | Analysis     | Least-Squares Means |          |        |        | Least Squares Mean differences vs CMR |          |        |        |
|-------------------------------|-----------|--------------|---------------------|----------|--------|--------|---------------------------------------|----------|--------|--------|
|                               |           |              | Est.                | Std Err. | 95% CI |        | Est.                                  | Std Err. | 95% CI |        |
|                               |           |              |                     |          | Lower  | Upper  |                                       |          | Lower  | Upper  |
| CMR (n=320)                   | 12 months | Primary      | 73.206              | 1.583    | 70.099 | 76.312 |                                       |          |        |        |
|                               |           | BL*Time      | 72.203              | 1.574    | 69.114 | 75.292 |                                       |          |        |        |
|                               |           | Mult. Imput. | 71.029              | 2.356    | 66.405 | 75.653 |                                       |          |        |        |
| SPECT (n=292)                 | 12 months | Primary      | 72.860              | 1.591    | 69.738 | 75.982 | -0.346                                | 1.646    | -3.576 | 2.884  |
|                               |           | BL*Time      | 72.078              | 1.583    | 68.971 | 75.184 | -0.126                                | 1.645    | -3.355 | 3.103  |
|                               |           | Mult. Imput. | 71.068              | 2.274    | 66.608 | 75.528 | 0.039                                 | 1.699    | -3.298 | 3.376  |
| CG95 (2010) (n=155)           | 12 months | Primary      | 68.943              | 1.973    | 65.071 | 72.815 | -4.263                                | 1.992    | -8.172 | -0.353 |
|                               |           | BL*Time      | 68.101              | 1.961    | 64.252 | 71.951 | -4.102                                | 1.991    | -8.009 | -0.195 |
|                               |           | Mult. Imput. | 66.689              | 2.575    | 61.637 | 71.742 | -4.339                                | 1.959    | -8.183 | -0.495 |
| CMR (n=268)                   | 36 months | Primary      | 74.419              | 1.665    | 71.152 | 77.687 |                                       |          |        |        |
|                               |           | BL*Time      | 73.636              | 1.656    | 70.385 | 76.886 |                                       |          |        |        |
|                               |           | Mult. Imput. | 71.822              | 2.429    | 67.056 | 76.589 |                                       |          |        |        |
| SPECT (n=243)                 | 36 months | Primary      | 75.247              | 1.680    | 71.950 | 78.545 | 0.828                                 | 1.805    | -2.713 | 4.370  |
|                               |           | BL*Time      | 74.415              | 1.671    | 71.136 | 77.695 | 0.780                                 | 1.796    | -2.745 | 4.305  |
|                               |           | Mult. Imput. | 72.646              | 2.466    | 67.804 | 77.488 | 0.824                                 | 1.817    | -2.747 | 4.394  |
| CG95 (2010) (n=127)           | 36 months | Primary      | 70.054              | 2.115    | 65.904 | 74.205 | -4.365                                | 2.192    | -8.667 | -0.063 |
|                               |           | BL*Time      | 69.139              | 2.099    | 65.020 | 73.258 | -4.497                                | 2.182    | -8.778 | -0.215 |
|                               |           | Mult. Imput. | 67.175              | 2.785    | 61.706 | 72.645 | -4.647                                | 2.176    | -8.922 | -0.373 |
| <b>Treatment Satisfaction</b> |           |              |                     |          |        |        |                                       |          |        |        |
| CMR (n=322)                   | 12 months | Primary      | 87.597              | 1.363    | 84.923 | 90.272 |                                       |          |        |        |
|                               |           | BL*Time      | 86.351              | 1.358    | 83.686 | 89.016 |                                       |          |        |        |
|                               |           | Mult. Imput. | 87.333              | 1.987    | 83.435 | 91.231 |                                       |          |        |        |
| SPECT (n=292)                 | 12 months | Primary      | 86.882              | 1.375    | 84.184 | 89.580 | -0.715                                | 1.434    | -3.531 | 2.100  |
|                               |           | BL*Time      | 85.799              | 1.370    | 83.111 | 88.487 | -0.552                                | 1.434    | -3.366 | 2.263  |
|                               |           | Mult. Imput. | 87.446              | 1.911    | 83.700 | 91.192 | 0.113                                 | 1.421    | -2.677 | 2.903  |
| CG95 (2010) (n=155)           | 12 months | Primary      | 85.342              | 1.709    | 81.987 | 88.696 | -2.256                                | 1.737    | -5.665 | 1.154  |
|                               |           | BL*Time      | 84.184              | 1.700    | 80.848 | 87.520 | -2.167                                | 1.737    | -5.575 | 1.241  |
|                               |           | Mult. Imput. | 85.416              | 2.205    | 81.091 | 89.742 | -1.917                                | 1.880    | -5.613 | 1.779  |
| CMR (n=269)                   | 36 months | Primary      | 87.962              | 1.426    | 85.163 | 90.762 |                                       |          |        |        |

| Domain / randomised arm | Time      | Analysis     | Least-Squares Means |          |        |        | Least Squares Mean differences vs CMR |          |        |       |
|-------------------------|-----------|--------------|---------------------|----------|--------|--------|---------------------------------------|----------|--------|-------|
|                         |           |              | Est.                | Std Err. | 95% CI |        | Est.                                  | Std Err. | 95% CI |       |
|                         |           |              |                     |          | Lower  | Upper  |                                       |          | Lower  | Upper |
| SPECT (n=242)           | 36 months | BL*Time      | 86.774              | 1.424    | 83.980 | 89.569 |                                       |          |        |       |
|                         |           | Mult. Imput. | 87.263              | 2.012    | 83.315 | 91.210 |                                       |          |        |       |
|                         |           | Primary      | 88.749              | 1.445    | 85.914 | 91.584 | 0.787                                 | 1.556    | -2.268 | 3.841 |
|                         |           | BL*Time      | 87.657              | 1.442    | 84.828 | 90.486 | 0.883                                 | 1.556    | -2.170 | 3.936 |
| CG95 (2010) (n=129)     | 36 months | Mult. Imput. | 88.533              | 2.026    | 84.558 | 92.507 | 1.270                                 | 1.558    | -1.789 | 4.328 |
|                         |           | Primary      | 86.260              | 1.813    | 82.702 | 89.818 | -1.702                                | 1.886    | -5.403 | 1.998 |
|                         |           | BL*Time      | 85.154              | 1.806    | 81.610 | 88.698 | -1.621                                | 1.884    | -5.319 | 2.078 |
|                         |           | Mult. Imput. | 85.928              | 2.401    | 81.214 | 90.642 | -1.335                                | 2.078    | -5.421 | 2.751 |

Primary: fixed effects baseline value, time (categorical), randomised arm, arm-by-time interaction, age, sex, randomising centre, pre-test likelihood category.  
Correlation handled by repeated measures within patients, unstructured covariance pattern.

BL\*Time: As for primary, but also including fixed effect for baseline\*time interaction.

## Appendix D: Supplementary analyses of SF12v2

Table D.1: Overall distribution of observed SF12v2 scale values, and frequency of floor/ceiling values at baseline, 12 and 36months follow-up. (Ranges 0=worst health, 100=best health)

|                              | 3T CMR-Guided Care<br>(n=481) | SPECT-Guided Care<br>(n=481) | NICE CG95 (2010)<br>(n=240) | Total (n=1202)         |
|------------------------------|-------------------------------|------------------------------|-----------------------------|------------------------|
| <b>Body Pain (BP)</b>        |                               |                              |                             |                        |
| <b>Baseline</b>              |                               |                              |                             |                        |
| n                            | 478                           | 479                          | 235                         | 1192                   |
| Mean (SD)                    | 65.6 (25.75)                  | 64.6 (27.22)                 | 62.9 (26.29)                | 64.7 (26.45)           |
| Median (Interquartile Range) | 75 ( 50 to 75 )               | 75 ( 50 to 75 )              | 75 ( 50 to 75 )             | 75 ( 50 to 75 )        |
| n (%) Min, Max value         | 14 (2.9%), 94 (19.7%)         | 22 (4.6%), 96 (20.0%)        | 8 (3.4%), 39 (16.6%)        | 44 (3.7%), 229 (19.2%) |
| <b>12 months</b>             |                               |                              |                             |                        |
| n                            | 331                           | 300                          | 158                         | 789                    |
| Mean (SD)                    | 73.0 (28.93)                  | 74.2 (28.10)                 | 70.9 (29.44)                | 73.0 (28.71)           |
| Median (Interquartile Range) | 75 ( 50 to 100 )              | 75 ( 50 to 100 )             | 75 ( 50 to 100 )            | 75 ( 50 to 100 )       |
| n (%) Min, Max value         | 13 (3.9%), 133 (40.2%)        | 10 (3.3%), 125 (41.7%)       | 8 (5.1%), 57 (36.1%)        | 31 (3.9%), 315 (39.9%) |
| <b>36 months</b>             |                               |                              |                             |                        |
| n                            | 281                           | 250                          | 137                         | 668                    |
| Mean (SD)                    | 75.4 (28.58)                  | 72.1 (29.96)                 | 71.0 (29.59)                | 73.2 (29.32)           |
| Median (Interquartile Range) | 75 ( 50 to 100 )              | 75 ( 50 to 100 )             | 75 ( 50 to 100 )            | 75 ( 50 to 100 )       |
| n (%) Min, Max value         | 11 (3.9%), 125 (44.5%)        | 15 (6.0%), 97 (38.8%)        | 5 (3.6%), 55 (40.1%)        | 31 (4.6%), 277 (41.5%) |
| <b>General Health (GH)</b>   |                               |                              |                             |                        |
| <b>Baseline</b>              |                               |                              |                             |                        |
| n                            | 478                           | 479                          | 235                         | 1192                   |
| Mean (SD)                    | 53.8 (26.13)                  | 54.0 (25.48)                 | 53.5 (26.80)                | 53.8 (25.98)           |
| Median (Interquartile Range) | 60 ( 25 to 60 )               | 60 ( 25 to 60 )              | 60 ( 25 to 60 )             | 60 ( 25 to 60 )        |
| n (%) Min, Max value         | 26 (5.4%), 15 (3.1%)          | 25 (5.2%), 17 (3.5%)         | 18 (7.7%), 8 (3.4%)         | 69 (5.8%), 40 (3.4%)   |
| <b>12 months</b>             |                               |                              |                             |                        |
| n                            | 332                           | 301                          | 157                         | 790                    |
| Mean (SD)                    | 56.6 (28.07)                  | 57.4 (26.54)                 | 55.4 (26.98)                | 56.7 (27.25)           |
| Median (Interquartile Range) | 60 ( 25 to 85 )               | 60 ( 25 to 85 )              | 60 ( 25 to 85 )             | 60 ( 25 to 85 )        |
| n (%) Min, Max value         | 24 (7.2%), 15 (4.5%)          | 15 (5.0%), 12 (4.0%)         | 13 (8.3%), 6 (3.8%)         | 52 (6.6%), 33 (4.2%)   |
| <b>36 months</b>             |                               |                              |                             |                        |
| n                            | 280                           | 250                          | 136                         | 666                    |

|                                  | <b>3T CMR-Guided Care<br/>(n=481)</b> | <b>SPECT-Guided Care<br/>(n=481)</b> | <b>NICE CG95 (2010)<br/>(n=240)</b> | <b>Total (n=1202)</b>   |
|----------------------------------|---------------------------------------|--------------------------------------|-------------------------------------|-------------------------|
| Mean (SD)                        | 57.5 (28.40)                          | 56.8 (27.21)                         | 56.8 (27.51)                        | 57.1 (27.74)            |
| Median (Interquartile Range)     | 60 ( 25 to 85 )                       | 60 ( 25 to 85 )                      | 60 ( 25 to 85 )                     | 60 ( 25 to 85 )         |
| n (%) Min, Max value             | 21 (7.5%), 15 (5.4%)                  | 16 (6.4%), 9 (3.6%)                  | 8 (5.9%), 7 (5.1%)                  | 45 (6.8%), 31 (4.7%)    |
| <b>Physical Functioning (PF)</b> |                                       |                                      |                                     |                         |
| <b>Baseline</b>                  |                                       |                                      |                                     |                         |
| n                                | 478                                   | 479                                  | 235                                 | 1192                    |
| Mean (SD)                        | 60.2 (31.05)                          | 58.1 (30.89)                         | 58.2 (31.44)                        | 59.0 (31.05)            |
| Median (Interquartile Range)     | 50 ( 50 to 91.1 )                     | 50 ( 45 to 75 )                      | 50 ( 50 to 75 )                     | 50 ( 50 to 75 )         |
| n (%) Min, Max value             | 39 (8.2%), 119 (24.9%)                | 41 (8.6%), 108 (22.5%)               | 24 (10.2%), 57 (24.3%)              | 104 (8.7%), 284 (23.8%) |
| <b>12 months</b>                 |                                       |                                      |                                     |                         |
| n                                | 332                                   | 301                                  | 158                                 | 791                     |
| Mean (SD)                        | 62.6 (33.50)                          | 64.0 (33.29)                         | 58.5 (33.06)                        | 62.3 (33.35)            |
| Median (Interquartile Range)     | 75 ( 50 to 100 )                      | 75 ( 50 to 100 )                     | 50 ( 25 to 75 )                     | 75 ( 50 to 100 )        |
| n (%) Min, Max value             | 39 (11.7%), 105 (31.6%)               | 31 (10.3%), 101 (33.6%)              | 19 (12.0%), 38 (24.1%)              | 89 (11.3%), 244 (30.8%) |
| <b>36 months</b>                 |                                       |                                      |                                     |                         |
| n                                | 282                                   | 250                                  | 137                                 | 669                     |
| Mean (SD)                        | 65.7 (33.26)                          | 63.2 (35.70)                         | 57.1 (36.50)                        | 63.0 (34.95)            |
| Median (Interquartile Range)     | 75 ( 50 to 100 )                      | 75 ( 45 to 100 )                     | 50 ( 25 to 100 )                    | 75 ( 45 to 100 )        |
| n (%) Min, Max value             | 26 (9.2%), 99 (35.1%)                 | 33 (13.2%), 91 (36.4%)               | 25 (18.2%), 39 (28.5%)              | 84 (12.6%), 229 (34.2%) |
| <b>Role Performance (RP)</b>     |                                       |                                      |                                     |                         |
| <b>Baseline</b>                  |                                       |                                      |                                     |                         |
| n                                | 478                                   | 478                                  | 234                                 | 1190                    |
| Mean (SD)                        | 64.3 (26.07)                          | 62.0 (26.11)                         | 63.0 (27.61)                        | 63.1 (26.39)            |
| Median (Interquartile Range)     | 62.5 ( 50 to 87.5 )                   | 62.5 ( 50 to 75 )                    | 62.5 ( 50 to 87.5 )                 | 62.5 ( 50 to 78.9 )     |
| n (%) Min, Max value             | 11 (2.3%), 91 (19.0%)                 | 17 (3.6%), 75 (15.7%)                | 11 (4.7%), 42 (17.9%)               | 39 (3.3%), 208 (17.5%)  |
| <b>12 months</b>                 |                                       |                                      |                                     |                         |
| n                                | 332                                   | 300                                  | 158                                 | 790                     |
| Mean (SD)                        | 70.6 (30.18)                          | 70.9 (28.48)                         | 69.0 (29.63)                        | 70.4 (29.41)            |
| Median (Interquartile Range)     | 75 ( 50 to 100 )                      | 75 ( 50 to 100 )                     | 75 ( 50 to 100 )                    | 75 ( 50 to 100 )        |
| n (%) Min, Max value             | 19 (5.7%), 113 (34.0%)                | 12 (4.0%), 98 (32.7%)                | 7 (4.4%), 49 (31.0%)                | 38 (4.8%), 260 (32.9%)  |
| <b>36 months</b>                 |                                       |                                      |                                     |                         |
| n                                | 282                                   | 250                                  | 136                                 | 668                     |



|                                         | <b>3T CMR-Guided Care<br/>(n=481)</b> | <b>SPECT-Guided Care<br/>(n=481)</b> | <b>NICE CG95 (2010)<br/>(n=240)</b> | <b>Total (n=1202)</b>  |
|-----------------------------------------|---------------------------------------|--------------------------------------|-------------------------------------|------------------------|
| Mean (SD)                               | 70.2 (29.63)                          | 69.1 (31.03)                         | 67.1 (29.64)                        | 69.2 (30.14)           |
| Median (Interquartile Range)            | 75 ( 50 to 100 )                      | 75 ( 50 to 100 )                     | 75 ( 50 to 100 )                    | 75 ( 50 to 100 )       |
| n (%) Min, Max value                    | 15 (5.3%), 91 (32.3%)                 | 14 (5.6%), 91 (36.4%)                | 5 (3.7%), 41 (30.1%)                | 34 (5.1%), 223 (33.4%) |
| <b>Physical Component Summary (PCS)</b> |                                       |                                      |                                     |                        |
| <b>Baseline</b>                         |                                       |                                      |                                     |                        |
| n                                       | 477                                   | 478                                  | 235                                 | 1190                   |
| Mean (SD)                               | 44.2 (9.71)                           | 43.9 (9.25)                          | 44.0 (9.45)                         | 44.1 (9.47)            |
| Median (Interquartile Range)            | 45.2 ( 37.4 to 51.7 )                 | 44.6 ( 37.8 to 50.9 )                | 43.9 ( 38.5 to 51.4 )               | 44.6 ( 37.8 to 51.4 )  |
| n (%) Min, Max value                    | 0 (0.0%), 0 (0.0%)                    | 0 (0.0%), 0 (0.0%)                   | 0 (0.0%), 0 (0.0%)                  | 0 (0.0%), 0 (0.0%)     |
| <b>12 months</b>                        |                                       |                                      |                                     |                        |
| n                                       | 332                                   | 299                                  | 157                                 | 788                    |
| Mean (SD)                               | 46.3 (10.34)                          | 46.6 (10.19)                         | 45.3 (10.22)                        | 46.2 (10.26)           |
| Median (Interquartile Range)            | 47.7 ( 40.8 to 55.6 )                 | 48.2 ( 40.6 to 55.4 )                | 46.3 ( 38.4 to 53.8 )               | 47.6 ( 39.9 to 55 )    |
| n (%) Min, Max value                    | 0 (0.0%), 0 (0.0%)                    | 0 (0.0%), 0 (0.0%)                   | 0 (0.0%), 0 (0.0%)                  | 0 (0.0%), 0 (0.0%)     |
| <b>36 months</b>                        |                                       |                                      |                                     |                        |
| n                                       | 278                                   | 250                                  | 137                                 | 665                    |
| Mean (SD)                               | 46.9 (11.16)                          | 45.8 (11.19)                         | 45.2 (10.99)                        | 46.1 (11.14)           |
| Median (Interquartile Range)            | 49.5 ( 40.6 to 55.9 )                 | 48.1 ( 38.3 to 55.6 )                | 46.7 ( 37.1 to 55.6 )               | 48.5 ( 38.6 to 55.9 )  |
| n (%) Min, Max value                    | 0 (0.0%), 0 (0.0%)                    | 0 (0.0%), 0 (0.0%)                   | 0 (0.0%), 0 (0.0%)                  | 0 (0.0%), 0 (0.0%)     |
| <b>Mental Health (MH)</b>               |                                       |                                      |                                     |                        |
| <b>Baseline</b>                         |                                       |                                      |                                     |                        |
| n                                       | 477                                   | 475                                  | 236                                 | 1188                   |
| Mean (SD)                               | 64.1 (21.17)                          | 63.7 (21.08)                         | 61.5 (23.30)                        | 63.4 (21.58)           |
| Median (Interquartile Range)            | 62.5 ( 50 to 75 )                     | 62.5 ( 50 to 75 )                    | 62.5 ( 50 to 75 )                   | 62.5 ( 50 to 75 )      |
| n (%) Min, Max value                    | 3 (0.6%), 21 (4.4%)                   | 1 (0.2%), 21 (4.4%)                  | 5 (2.1%), 10 (4.2%)                 | 9 (0.8%), 52 (4.4%)    |
| <b>12 months</b>                        |                                       |                                      |                                     |                        |
| n                                       | 332                                   | 299                                  | 157                                 | 788                    |
| Mean (SD)                               | 65.8 (23.92)                          | 66.8 (21.50)                         | 66.6 (23.03)                        | 66.4 (22.83)           |
| Median (Interquartile Range)            | 75 ( 50 to 87.5 )                     | 75 ( 50 to 87.5 )                    | 75 ( 50 to 87.5 )                   | 75 ( 50 to 87.5 )      |
| n (%) Min, Max value                    | 5 (1.5%), 33 (9.9%)                   | 2 (0.7%), 23 (7.7%)                  | 2 (1.3%), 10 (6.4%)                 | 9 (1.1%), 66 (8.4%)    |
| <b>36 months</b>                        |                                       |                                      |                                     |                        |
| n                                       | 278                                   | 250                                  | 137                                 | 665                    |

|                                | <b>3T CMR-Guided Care<br/>(n=481)</b> | <b>SPECT-Guided Care<br/>(n=481)</b> | <b>NICE CG95 (2010)<br/>(n=240)</b> | <b>Total (n=1202)</b>  |
|--------------------------------|---------------------------------------|--------------------------------------|-------------------------------------|------------------------|
| Mean (SD)                      | 66.8 (23.21)                          | 69.6 (20.45)                         | 66.3 (22.42)                        | 67.7 (22.06)           |
| Median (Interquartile Range)   | 75 ( 50 to 87.5 )                     | 75 ( 50 to 87.5 )                    | 75 ( 50 to 87.5 )                   | 75 ( 50 to 87.5 )      |
| n (%) Min, Max value           | 4 (1.4%), 20 (7.2%)                   | 2 (0.8%), 22 (8.8%)                  | 2 (1.5%), 9 (6.6%)                  | 8 (1.2%), 51 (7.7%)    |
| <b>Role Emotional (RE)</b>     |                                       |                                      |                                     |                        |
| <b>Baseline</b>                |                                       |                                      |                                     |                        |
| n                              | 478                                   | 478                                  | 235                                 | 1191                   |
| Mean (SD)                      | 79.5 (24.82)                          | 76.2 (26.71)                         | 76.1 (26.70)                        | 77.5 (26.00)           |
| Median (Interquartile Range)   | 87.5 ( 62.5 to 100 )                  | 87.5 ( 50 to 100 )                   | 75 ( 50 to 100 )                    | 87.5 ( 62.5 to 100 )   |
| n (%) Min, Max value           | 6 (1.3%), 222 (46.4%)                 | 9 (1.9%), 201 (42.1%)                | 4 (1.7%), 99 (42.1%)                | 19 (1.6%), 522 (43.8%) |
| <b>12 months</b>               |                                       |                                      |                                     |                        |
| n                              | 332                                   | 301                                  | 158                                 | 791                    |
| Mean (SD)                      | 79.3 (26.89)                          | 80.8 (25.62)                         | 77.7 (28.47)                        | 79.5 (26.73)           |
| Median (Interquartile Range)   | 100 ( 60.7 to 100 )                   | 100 ( 75 to 100 )                    | 87.5 ( 62.5 to 100 )                | 100 ( 62.5 to 100 )    |
| n (%) Min, Max value           | 10 (3.0%), 169 (50.9%)                | 4 (1.3%), 151 (50.2%)                | 5 (3.2%), 77 (48.7%)                | 19 (2.4%), 397 (50.2%) |
| <b>36 months</b>               |                                       |                                      |                                     |                        |
| n                              | 282                                   | 250                                  | 137                                 | 669                    |
| Mean (SD)                      | 80.2 (25.01)                          | 79.9 (26.17)                         | 76.0 (27.09)                        | 79.2 (25.89)           |
| Median (Interquartile Range)   | 100 ( 62.5 to 100 )                   | 98 ( 75 to 100 )                     | 75 ( 50 to 100 )                    | 87.5 ( 62.5 to 100 )   |
| n (%) Min, Max value           | 2 (0.7%), 144 (51.1%)                 | 6 (2.4%), 123 (49.2%)                | 3 (2.2%), 59 (43.1%)                | 11 (1.6%), 326 (48.7%) |
| <b>Social Functioning (SF)</b> |                                       |                                      |                                     |                        |
| <b>Baseline</b>                |                                       |                                      |                                     |                        |
| n                              | 476                                   | 478                                  | 236                                 | 1190                   |
| Mean (SD)                      | 74.0 (28.24)                          | 74.7 (27.40)                         | 71.2 (28.92)                        | 73.7 (28.05)           |
| Median (Interquartile Range)   | 75 ( 50 to 100 )                      | 75 ( 50 to 100 )                     | 75 ( 50 to 100 )                    | 75 ( 50 to 100 )       |
| n (%) Min, Max value           | 17 (3.6%), 207 (43.5%)                | 15 (3.1%), 207 (43.3%)               | 8 (3.4%), 94 (39.8%)                | 40 (3.4%), 508 (42.7%) |
| <b>12 months</b>               |                                       |                                      |                                     |                        |
| n                              | 332                                   | 299                                  | 158                                 | 789                    |
| Mean (SD)                      | 77.0 (28.12)                          | 77.1 (27.51)                         | 75.6 (30.12)                        | 76.8 (28.28)           |
| Median (Interquartile Range)   | 87.5 ( 50 to 100 )                    | 75 ( 50 to 100 )                     | 100 ( 50 to 100 )                   | 100 ( 50 to 100 )      |
| n (%) Min, Max value           | 13 (3.9%), 166 (50.0%)                | 9 (3.0%), 149 (49.8%)                | 6 (3.8%), 81 (51.3%)                | 28 (3.5%), 396 (50.2%) |
| <b>36 months</b>               |                                       |                                      |                                     |                        |
| n                              | 278                                   | 249                                  | 135                                 | 662                    |

|                                       | <b>3T CMR-Guided Care<br/>(n=481)</b> | <b>SPECT-Guided Care<br/>(n=481)</b> | <b>NICE CG95 (2010)<br/>(n=240)</b> | <b>Total (n=1202)</b>  |
|---------------------------------------|---------------------------------------|--------------------------------------|-------------------------------------|------------------------|
| Mean (SD)                             | 77.1 (27.82)                          | 76.6 (28.97)                         | 73.9 (29.75)                        | 76.2 (28.64)           |
| Median (Interquartile Range)          | 100 ( 50 to 100 )                     | 100 ( 50 to 100 )                    | 75 ( 50 to 100 )                    | 100 ( 50 to 100 )      |
| n (%) Min, Max value                  | 8 (2.9%), 140 (50.4%)                 | 9 (3.6%), 128 (51.4%)                | 4 (3.0%), 64 (47.4%)                | 21 (3.2%), 332 (50.2%) |
| <b>Vitality (VT)</b>                  |                                       |                                      |                                     |                        |
| <b>Baseline</b>                       |                                       |                                      |                                     |                        |
| n                                     | 474                                   | 475                                  | 235                                 | 1184                   |
| Mean (SD)                             | 47.4 (25.62)                          | 44.8 (25.69)                         | 45.7 (26.00)                        | 46.0 (25.73)           |
| Median (Interquartile Range)          | 50 ( 25 to 75 )                       | 50 ( 25 to 75 )                      | 50 ( 25 to 75 )                     | 50 ( 25 to 75 )        |
| n (%) Min, Max value                  | 47 (9.9%), 13 (2.7%)                  | 59 (12.4%), 14 (2.9%)                | 27 (11.5%), 6 (2.6%)                | 133 (11.2%), 33 (2.8%) |
| <b>12 months</b>                      |                                       |                                      |                                     |                        |
| n                                     | 327                                   | 296                                  | 156                                 | 779                    |
| Mean (SD)                             | 50.5 (26.92)                          | 50.7 (24.86)                         | 51.4 (25.60)                        | 50.7 (25.86)           |
| Median (Interquartile Range)          | 50 ( 25 to 75 )                       | 50 ( 25 to 75 )                      | 50 ( 25 to 75 )                     | 50 ( 25 to 75 )        |
| n (%) Min, Max value                  | 39 (11.9%), 11 (3.4%)                 | 26 (8.8%), 8 (2.7%)                  | 14 (9.0%), 4 (2.6%)                 | 79 (10.1%), 23 (3.0%)  |
| <b>36 months</b>                      |                                       |                                      |                                     |                        |
| n                                     | 275                                   | 248                                  | 137                                 | 660                    |
| Mean (SD)                             | 50.2 (26.85)                          | 51.1 (25.08)                         | 51.6 (27.15)                        | 50.8 (26.23)           |
| Median (Interquartile Range)          | 50 ( 25 to 75 )                       | 50 ( 25 to 75 )                      | 50 ( 25 to 75 )                     | 50 ( 25 to 75 )        |
| n (%) Min, Max value                  | 30 (10.9%), 10 (3.6%)                 | 23 (9.3%), 6 (2.4%)                  | 14 (10.2%), 8 (5.8%)                | 67 (10.2%), 24 (3.6%)  |
| <b>Mental Component Summary (MCS)</b> |                                       |                                      |                                     |                        |
| <b>Baseline</b>                       |                                       |                                      |                                     |                        |
| n                                     | 477                                   | 475                                  | 235                                 | 1187                   |
| Mean (SD)                             | 49.2 (9.86)                           | 48.6 (10.46)                         | 47.9 (11.10)                        | 48.7 (10.36)           |
| Median (Interquartile Range)          | 50.7 ( 43.3 to 57.3 )                 | 50.5 ( 41.6 to 56.8 )                | 49.6 ( 40.8 to 56.7 )               | 50.5 ( 41.9 to 56.9 )  |
| n (%) Min, Max value                  | 0 (0.0%), 0 (0.0%)                    | 0 (0.0%), 0 (0.0%)                   | 0 (0.0%), 0 (0.0%)                  | 0 (0.0%), 0 (0.0%)     |
| <b>12 months</b>                      |                                       |                                      |                                     |                        |
| n                                     | 332                                   | 299                                  | 157                                 | 788                    |
| Mean (SD)                             | 49.3 (10.83)                          | 49.7 (9.76)                          | 49.7 (10.72)                        | 49.6 (10.40)           |
| Median (Interquartile Range)          | 52.2 ( 42.2 to 57.4 )                 | 52.3 ( 43.9 to 57.4 )                | 53 ( 43.1 to 57.5 )                 | 52.3 ( 43 to 57.4 )    |
| n (%) Min, Max value                  | 0 (0.0%), 0 (0.0%)                    | 0 (0.0%), 0 (0.0%)                   | 0 (0.0%), 0 (0.0%)                  | 0 (0.0%), 0 (0.0%)     |
| <b>36 months</b>                      |                                       |                                      |                                     |                        |
| n                                     | 278                                   | 250                                  | 137                                 | 665                    |

|                              | <b>3T CMR-Guided Care<br/>(n=481)</b> | <b>SPECT-Guided Care<br/>(n=481)</b> | <b>NICE CG95 (2010)<br/>(n=240)</b> | <b>Total (n=1202)</b> |
|------------------------------|---------------------------------------|--------------------------------------|-------------------------------------|-----------------------|
| Mean (SD)                    | 49.4 (10.43)                          | 50.4 (9.23)                          | 49.4 (10.20)                        | 49.8 (9.95)           |
| Median (Interquartile Range) | 52.3 ( 41.8 to 57.4 )                 | 52.7 ( 44.7 to 57.4 )                | 51.9 ( 42.9 to 57.4 )               | 52.4 ( 43 to 57.4 )   |
| n (%) Min, Max value         | 0 (0.0%), 0 (0.0%)                    | 0 (0.0%), 0 (0.0%)                   | 0 (0.0%), 0 (0.0%)                  | 0 (0.0%), 0 (0.0%)    |

Table D2: Comparison of primary and sensitivity mixed effects (random coefficients) modelling of SF12v2

| Domain / Analysis                 | CG95 (2010) vs CMR |                |         |         | SPECT vs CMR |                |         |         |
|-----------------------------------|--------------------|----------------|---------|---------|--------------|----------------|---------|---------|
|                                   | Estimate           | Standard Error | 95% CI  |         | Estimate     | Standard Error | 95% CI  |         |
|                                   |                    |                | Lower   | Upper   |              |                | Lower   | Upper   |
| <b>Body Pain</b>                  |                    |                |         |         |              |                |         |         |
| Primary                           | -0.0777            | 0.070          | -0.2156 | 0.0602  | -0.1058      | 0.059          | -0.2221 | 0.0106  |
| Baseline*Time                     | -0.0780            | 0.070          | -0.2161 | 0.0601  | -0.1081      | 0.059          | -0.2246 | 0.0084  |
| Multiple Imputation               | -0.0841            | 0.078          | -0.2368 | 0.0687  | -0.0878      | 0.063          | -0.2116 | 0.0360  |
| Proportional Odds                 | -0.0091            | 0.010          | -0.0281 | 0.0100  | -0.0172      | 0.008          | -0.0333 | -0.0011 |
| <b>General Health</b>             |                    |                |         |         |              |                |         |         |
| Primary                           | -0.0647            | 0.069          | -0.2000 | 0.0706  | 0.0048       | 0.056          | -0.1042 | 0.1138  |
| Baseline*Time                     | -0.0627            | 0.069          | -0.1978 | 0.0724  | 0.0051       | 0.056          | -0.1039 | 0.1142  |
| Multiple Imputation               | -0.0391            | 0.069          | -0.1756 | 0.0974  | 0.0119       | 0.057          | -0.1010 | 0.1248  |
| Proportional Odds                 | -0.0063            | 0.010          | -0.0256 | 0.0130  | -0.0019      | 0.008          | -0.0181 | 0.0143  |
| <b>Mental Component Summary</b>   |                    |                |         |         |              |                |         |         |
| Primary                           | -0.0057            | 0.028          | -0.0612 | 0.0498  | 0.0196       | 0.023          | -0.0260 | 0.0652  |
| Baseline*Time                     | -0.0088            | 0.028          | -0.0643 | 0.0466  | 0.0152       | 0.023          | -0.0304 | 0.0607  |
| Multiple Imputation               | 0.0002             | 0.028          | -0.0554 | 0.0557  | 0.0206       | 0.025          | -0.0296 | 0.0708  |
| <b>Mental Health</b>              |                    |                |         |         |              |                |         |         |
| Primary                           | -0.0431            | 0.063          | -0.1674 | 0.0812  | 0.0440       | 0.052          | -0.0578 | 0.1458  |
| Baseline*Time                     | -0.0438            | 0.063          | -0.1681 | 0.0805  | 0.0402       | 0.052          | -0.0614 | 0.1418  |
| Multiple Imputation               | -0.0470            | 0.065          | -0.1758 | 0.0817  | 0.0571       | 0.051          | -0.0429 | 0.1570  |
| <b>Physical Component Summary</b> |                    |                |         |         |              |                |         |         |
| Primary                           | -0.0516            | 0.025          | -0.1006 | -0.0025 | -0.0162      | 0.021          | -0.0567 | 0.0243  |
| Baseline*Time                     | -0.0512            | 0.025          | -0.1002 | -0.0022 | -0.0170      | 0.021          | -0.0575 | 0.0236  |
| Multiple Imputation               | -0.0513            | 0.027          | -0.1043 | 0.0016  | -0.0149      | 0.023          | -0.0597 | 0.0299  |
| <b>Physical Functioning</b>       |                    |                |         |         |              |                |         |         |
| Primary                           | -0.2242            | 0.083          | -0.3862 | -0.0623 | -0.0355      | 0.065          | -0.1637 | 0.0926  |
| Baseline*Time                     | -0.2254            | 0.083          | -0.3874 | -0.0633 | -0.0414      | 0.065          | -0.1698 | 0.0871  |
| Multiple Imputation               | -0.2296            | 0.079          | -0.3851 | -0.0741 | -0.0335      | 0.067          | -0.1645 | 0.0975  |
| <b>Role Emotional</b>             |                    |                |         |         |              |                |         |         |
| Primary                           | -0.0610            | 0.071          | -0.2007 | 0.0787  | 0.0024       | 0.060          | -0.1161 | 0.1209  |
| Baseline*Time                     | -0.0680            | 0.071          | -0.2083 | 0.0722  | -0.0055      | 0.061          | -0.1246 | 0.1136  |
| Multiple Imputation               | -0.0160            | 0.078          | -0.1690 | 0.1370  | 0.0168       | 0.061          | -0.1041 | 0.1377  |
| <b>Role Performance</b>           |                    |                |         |         |              |                |         |         |
| Primary                           | -0.0996            | 0.070          | -0.2379 | 0.0387  | 0.0191       | 0.059          | -0.0976 | 0.1358  |

| Domain / Analysis         | CG95 (2010) vs CMR |                |         |        | SPECT vs CMR |                |         |        |
|---------------------------|--------------------|----------------|---------|--------|--------------|----------------|---------|--------|
|                           | Estimate           | Standard Error | 95% CI  |        | Estimate     | Standard Error | 95% CI  |        |
|                           |                    |                | Lower   | Upper  |              |                | Lower   | Upper  |
| Baseline*Time             | -0.0979            | 0.070          | -0.2360 | 0.0402 | 0.0154       | 0.060          | -0.1015 | 0.1323 |
| Multiple Imputation       | -0.0810            | 0.069          | -0.2165 | 0.0546 | 0.0138       | 0.062          | -0.1079 | 0.1354 |
| <b>Social Functioning</b> |                    |                |         |        |              |                |         |        |
| Primary                   | -0.0829            | 0.076          | -0.2324 | 0.0666 | -0.0297      | 0.064          | -0.1561 | 0.0967 |
| Baseline*Time             | -0.0857            | 0.076          | -0.2354 | 0.0641 | -0.0319      | 0.064          | -0.1584 | 0.0946 |
| Multiple Imputation       | -0.0663            | 0.087          | -0.2386 | 0.1060 | -0.0384      | 0.072          | -0.1805 | 0.1036 |
| Proportional Odds         | -0.0094            | 0.010          | -0.0281 | 0.0094 | -0.0054      | 0.008          | -0.0212 | 0.0104 |
| <b>Vitality</b>           |                    |                |         |        |              |                |         |        |
| Primary                   | -0.0255            | 0.074          | -0.1707 | 0.1197 | 0.0737       | 0.060          | -0.0447 | 0.1922 |
| Baseline*Time             | -0.0246            | 0.074          | -0.1699 | 0.1207 | 0.0740       | 0.061          | -0.0451 | 0.1932 |
| Multiple Imputation       | -0.0222            | 0.079          | -0.1775 | 0.1332 | 0.0791       | 0.061          | -0.0402 | 0.1985 |
| Proportional Odds         | 0.0006             | 0.009          | -0.0170 | 0.0183 | 0.0078       | 0.008          | -0.0071 | 0.0227 |

Estimate=Estimated interaction effect between NICE (or SPECT) and time in months. Negative values indicate CMR improving vs comparator, positive values indicate comparator improving vs CMR.

Lower/Upper = Limits of 95% Confidence Interval for the difference

Baseline\*Time=Fitting the primary analysis model, with an additional fixed interaction effect for baseline-by-time, allowing patients with different health statuses to have different trajectories during the follow-up.

Proportional Odds=Replacing linear mixed model with an ordinal proportional odds model, modelling the odds of moving up to greater values. Only done for the Body Pain, General Health, Social Functioning and Vitality scales, derived from a single 5-item question. Values <0 represent reduced log-odds per month of moving to higher scores for CG95/SPECT vs CMR, values >0 represent increased log-odds per month of moving up to higher scores vs CMR. Thus the estimate of = -0.0172 for Body Pain in the SPECT comparison indicates that the odds of a SPECT patient having a higher Body Pain score change by  $\exp(-0.0172) - 1 = -1.71\%$  per month compared to the CMR arm.

Table D3: Comparison of primary and sensitivity Repeated Measures (covariance pattern) models of SF12v2 domains at 12 and 36 months post-randomisation

| Domain / randomised arm | Time      | Analysis     | Least-Squares Means |         |        |        | Least Squares Mean differences vs CMR |         |        |       |
|-------------------------|-----------|--------------|---------------------|---------|--------|--------|---------------------------------------|---------|--------|-------|
|                         |           |              | Est.                | Std Err | 95% CI |        | Est.                                  | Std Err | 95% CI |       |
|                         |           |              |                     |         | Lower  | Upper  |                                       |         | Lower  | Upper |
| <b>Body Pain</b>        |           |              |                     |         |        |        |                                       |         |        |       |
| CMR (n=331)             | 12 months | Primary      | 71.244              | 1.763   | 67.785 | 74.703 |                                       |         |        |       |
|                         |           | BL*Time      | 71.268              | 1.762   | 67.809 | 74.727 |                                       |         |        |       |
|                         |           | Mult. Imput. | 70.088              | 2.510   | 65.166 | 75.010 |                                       |         |        |       |
| SPECT (n=300)           | 12 months | Primary      | 72.525              | 1.771   | 69.049 | 76.001 | 1.281                                 | 1.862   | -2.373 | 4.935 |
|                         |           | BL*Time      | 72.514              | 1.771   | 69.039 | 75.990 | 1.246                                 | 1.862   | -2.408 | 4.901 |
|                         |           | Mult. Imput. | 71.038              | 2.483   | 66.169 | 75.907 | 0.950                                 | 1.927   | -2.835 | 4.735 |
| CG95 (2010) (n=158)     | 12 months | Primary      | 69.102              | 2.217   | 64.751 | 73.452 | -2.142                                | 2.263   | -6.583 | 2.299 |
|                         |           | BL*Time      | 69.111              | 2.217   | 64.761 | 73.461 | -2.157                                | 2.263   | -6.598 | 2.284 |
|                         |           | Mult. Imput. | 68.125              | 2.839   | 62.557 | 73.693 | -1.963                                | 2.196   | -6.270 | 2.344 |
| CMR (n=281)             | 36 months | Primary      | 72.534              | 1.849   | 68.906 | 76.162 |                                       |         |        |       |
|                         |           | BL*Time      | 72.555              | 1.849   | 68.926 | 76.184 |                                       |         |        |       |
|                         |           | Mult. Imput. | 70.607              | 2.528   | 65.649 | 75.565 |                                       |         |        |       |
| SPECT (n=250)           | 36 months | Primary      | 70.213              | 1.872   | 66.539 | 73.887 | -2.321                                | 2.033   | -6.311 | 1.669 |
|                         |           | BL*Time      | 70.200              | 1.872   | 66.526 | 73.874 | -2.355                                | 2.034   | -6.347 | 1.638 |
|                         |           | Mult. Imput. | 68.404              | 2.648   | 63.210 | 73.598 | -2.203                                | 2.178   | -6.487 | 2.081 |
| CG95 (2010) (n=137)     | 36 months | Primary      | 68.521              | 2.347   | 63.915 | 73.126 | -4.013                                | 2.455   | -8.831 | 0.805 |
|                         |           | BL*Time      | 68.542              | 2.347   | 63.936 | 73.149 | -4.013                                | 2.456   | -8.832 | 0.807 |
|                         |           | Mult. Imput. | 66.198              | 2.995   | 60.321 | 72.075 | -4.409                                | 2.605   | -9.529 | 0.711 |
| <b>General Health</b>   |           |              |                     |         |        |        |                                       |         |        |       |
| CMR (n=332)             | 12 months | Primary      | 56.038              | 1.494   | 53.106 | 58.971 |                                       |         |        |       |
|                         |           | BL*Time      | 56.040              | 1.494   | 53.107 | 58.972 |                                       |         |        |       |
|                         |           | Mult. Imput. | 56.907              | 2.089   | 52.811 | 61.002 |                                       |         |        |       |
| SPECT (n=301)           | 12 months | Primary      | 55.894              | 1.503   | 52.944 | 58.844 | -0.144                                | 1.577   | -3.239 | 2.951 |
|                         |           | BL*Time      | 55.885              | 1.503   | 52.935 | 58.835 | -0.155                                | 1.577   | -3.250 | 2.940 |
|                         |           | Mult. Imput. | 56.919              | 2.115   | 52.772 | 61.066 | 0.012                                 | 1.589   | -3.108 | 3.133 |
| CG95 (2010) (n=157)     | 12 months | Primary      | 53.386              | 1.885   | 49.685 | 57.086 | -2.653                                | 1.920   | -6.421 | 1.116 |
|                         |           | BL*Time      | 53.368              | 1.886   | 49.667 | 57.069 | -2.672                                | 1.920   | -6.440 | 1.097 |

| Domain / randomised arm         | Time      | Analysis     | Least-Squares Means |         |        |        | Least Squares Mean differences vs CMR |         |        |       |
|---------------------------------|-----------|--------------|---------------------|---------|--------|--------|---------------------------------------|---------|--------|-------|
|                                 |           |              | Est.                | Std Err | 95% CI |        | Est.                                  | Std Err | 95% CI |       |
|                                 |           |              |                     |         | Lower  | Upper  |                                       |         | Lower  | Upper |
| CMR (n=280)                     | 36 months | Mult. Imput. | 54.756              | 2.404   | 50.040 | 59.472 |                                       |         |        |       |
|                                 |           | Primary      | 55.716              | 1.634   | 52.508 | 58.923 |                                       |         |        |       |
|                                 |           | BL*Time      | 55.767              | 1.634   | 52.560 | 58.974 |                                       |         |        |       |
| SPECT (n=250)                   | 36 months | Mult. Imput. | 56.521              | 2.252   | 52.102 | 60.940 | -0.910                                | 1.847   | -4.535 | 2.714 |
|                                 |           | Primary      | 54.805              | 1.661   | 51.546 | 58.065 |                                       |         |        |       |
|                                 |           | BL*Time      | 54.835              | 1.661   | 51.576 | 58.095 |                                       |         |        |       |
| CG95 (2010) (n=136)             | 36 months | Mult. Imput. | 55.906              | 2.225   | 51.541 | 60.272 | -0.615                                | 1.809   | -4.168 | 2.939 |
|                                 |           | Primary      | 53.555              | 2.098   | 49.438 | 57.673 |                                       |         |        |       |
|                                 |           | BL*Time      | 53.634              | 2.099   | 49.515 | 57.753 |                                       |         |        |       |
|                                 |           | Mult. Imput. | 55.036              | 2.580   | 49.974 | 60.097 | -1.485                                | 2.220   | -5.846 | 2.875 |
| <b>Mental Component Summary</b> |           |              |                     |         |        |        |                                       |         |        |       |
| CMR (n=332)                     | 12 months | Primary      | 49.673              | 0.630   | 48.436 | 50.909 |                                       |         |        |       |
|                                 |           | BL*Time      | 49.683              | 0.630   | 48.446 | 50.919 |                                       |         |        |       |
|                                 |           | Mult. Imput. | 49.168              | 0.901   | 47.400 | 50.935 |                                       |         |        |       |
| SPECT (n=299)                   | 12 months | Primary      | 50.411              | 0.636   | 49.163 | 51.658 | 0.738                                 | 0.683   | -0.603 | 2.079 |
|                                 |           | BL*Time      | 50.419              | 0.636   | 49.171 | 51.667 | 0.736                                 | 0.684   | -0.606 | 2.079 |
|                                 |           | Mult. Imput. | 49.937              | 0.908   | 48.155 | 51.719 | 0.770                                 | 0.697   | -0.598 | 2.138 |
| CG95 (2010) (n=157)             | 12 months | Primary      | 49.965              | 0.802   | 48.392 | 51.539 | 0.293                                 | 0.831   | -1.337 | 1.923 |
|                                 |           | BL*Time      | 49.970              | 0.802   | 48.396 | 51.543 | 0.287                                 | 0.831   | -1.344 | 1.917 |
|                                 |           | Mult. Imput. | 49.344              | 1.037   | 47.309 | 51.378 | 0.176                                 | 0.858   | -1.510 | 1.862 |
| CMR (n=278)                     | 36 months | Primary      | 49.412              | 0.653   | 48.130 | 50.693 |                                       |         |        |       |
|                                 |           | BL*Time      | 49.508              | 0.652   | 48.229 | 50.788 |                                       |         |        |       |
|                                 |           | Mult. Imput. | 49.126              | 0.925   | 47.310 | 50.941 |                                       |         |        |       |
| SPECT (n=250)                   | 36 months | Primary      | 50.931              | 0.662   | 49.632 | 52.231 | 1.519                                 | 0.727   | 0.093  | 2.946 |
|                                 |           | BL*Time      | 50.926              | 0.660   | 49.630 | 52.221 | 1.417                                 | 0.725   | -0.005 | 2.839 |
|                                 |           | Mult. Imput. | 50.665              | 0.936   | 48.828 | 52.502 | 1.539                                 | 0.793   | -0.021 | 3.100 |
| CG95 (2010) (n=137)             | 36 months | Primary      | 49.667              | 0.830   | 48.037 | 51.296 | 0.255                                 | 0.876   | -1.464 | 1.974 |
|                                 |           | BL*Time      | 49.684              | 0.828   | 48.060 | 51.309 | 0.176                                 | 0.872   | -1.536 | 1.888 |
|                                 |           | Mult. Imput. | 49.345              | 1.092   | 47.201 | 51.489 | 0.219                                 | 0.928   | -1.606 | 2.045 |



| Domain / randomised arm           | Time      | Analysis     | Least-Squares Means |         |        |        | Least Squares Mean differences vs CMR |         |        |       |
|-----------------------------------|-----------|--------------|---------------------|---------|--------|--------|---------------------------------------|---------|--------|-------|
|                                   |           |              | Est.                | Std Err | 95% CI |        | Est.                                  | Std Err | 95% CI |       |
|                                   |           |              |                     |         | Lower  | Upper  |                                       |         | Lower  | Upper |
| <b>Mental Health</b>              |           |              |                     |         |        |        |                                       |         |        |       |
| CMR (n=332)                       | 12 months | Primary      | 65.783              | 1.399   | 63.038 | 68.528 |                                       |         |        |       |
|                                   |           | BL*Time      | 65.794              | 1.399   | 63.048 | 68.539 |                                       |         |        |       |
|                                   |           | Mult. Imput. | 64.988              | 1.997   | 61.072 | 68.905 |                                       |         |        |       |
| SPECT (n=299)                     | 12 months | Primary      | 66.961              | 1.413   | 64.187 | 69.734 | 1.178                                 | 1.530   | -1.825 | 4.180 |
|                                   |           | BL*Time      | 66.958              | 1.414   | 64.184 | 69.732 | 1.164                                 | 1.531   | -1.840 | 4.168 |
|                                   |           | Mult. Imput. | 66.151              | 1.970   | 62.288 | 70.014 | 1.162                                 | 1.546   | -1.873 | 4.198 |
| CG95 (2010) (n=157)               | 12 months | Primary      | 65.782              | 1.786   | 62.277 | 69.288 | -0.001                                | 1.860   | -3.652 | 3.650 |
|                                   |           | BL*Time      | 65.784              | 1.787   | 62.278 | 69.291 | -0.009                                | 1.861   | -3.662 | 3.643 |
|                                   |           | Mult. Imput. | 64.646              | 2.313   | 60.107 | 69.184 | -0.342                                | 1.879   | -4.032 | 3.347 |
| CMR (n=278)                       | 36 months | Primary      | 65.995              | 1.436   | 63.176 | 68.813 |                                       |         |        |       |
|                                   |           | BL*Time      | 66.056              | 1.436   | 63.237 | 68.875 |                                       |         |        |       |
|                                   |           | Mult. Imput. | 65.708              | 1.997   | 61.791 | 69.626 |                                       |         |        |       |
| SPECT (n=250)                     | 36 months | Primary      | 69.426              | 1.457   | 66.567 | 72.284 | 3.431                                 | 1.600   | 0.290  | 6.572 |
|                                   |           | BL*Time      | 69.433              | 1.456   | 66.576 | 72.291 | 3.377                                 | 1.600   | 0.237  | 6.517 |
|                                   |           | Mult. Imput. | 69.303              | 1.973   | 65.433 | 73.174 | 3.595                                 | 1.527   | 0.597  | 6.592 |
| CG95 (2010) (n=137)               | 36 months | Primary      | 65.434              | 1.827   | 61.849 | 69.019 | -0.561                                | 1.928   | -4.344 | 3.222 |
|                                   |           | BL*Time      | 65.492              | 1.827   | 61.907 | 69.077 | -0.564                                | 1.927   | -4.345 | 3.217 |
|                                   |           | Mult. Imput. | 64.700              | 2.239   | 60.308 | 69.092 | -1.008                                | 1.898   | -4.736 | 2.719 |
| <b>Physical Component Summary</b> |           |              |                     |         |        |        |                                       |         |        |       |
| CMR (n=332)                       | 12 months | Primary      | 45.836              | 0.555   | 44.747 | 46.925 |                                       |         |        |       |
|                                   |           | BL*Time      | 45.836              | 0.555   | 44.747 | 46.925 |                                       |         |        |       |
|                                   |           | Mult. Imput. | 46.623              | 0.797   | 45.059 | 48.187 |                                       |         |        |       |
| SPECT (n=299)                     | 12 months | Primary      | 46.161              | 0.559   | 45.065 | 47.258 | 0.325                                 | 0.581   | -0.814 | 1.465 |
|                                   |           | BL*Time      | 46.156              | 0.559   | 45.060 | 47.252 | 0.320                                 | 0.581   | -0.820 | 1.459 |
|                                   |           | Mult. Imput. | 46.972              | 0.804   | 45.395 | 48.549 | 0.349                                 | 0.557   | -0.744 | 1.441 |
| CG95 (2010) (n=157)               | 12 months | Primary      | 44.502              | 0.698   | 43.133 | 45.871 | -1.334                                | 0.706   | -2.720 | 0.053 |
|                                   |           | BL*Time      | 44.516              | 0.697   | 43.147 | 45.884 | -1.321                                | 0.706   | -2.707 | 0.065 |
|                                   |           | Mult. Imput. | 45.501              | 0.916   | 43.705 | 47.298 | -1.122                                | 0.698   | -2.493 | 0.249 |

| Domain / randomised arm     | Time      | Analysis     | Least-Squares Means |         |        |        | Least Squares Mean differences vs CMR |         |         |        |
|-----------------------------|-----------|--------------|---------------------|---------|--------|--------|---------------------------------------|---------|---------|--------|
|                             |           |              | Est.                | Std Err | 95% CI |        | Est.                                  | Std Err | 95% CI  |        |
|                             |           |              |                     |         | Lower  | Upper  |                                       |         | Lower   | Upper  |
| CMR (n=278)                 | 36 months | Primary      | 45.967              | 0.620   | 44.750 | 47.184 |                                       |         |         |        |
|                             |           | BL*Time      | 45.968              | 0.620   | 44.751 | 47.186 |                                       |         |         |        |
|                             |           | Mult. Imput. | 46.590              | 0.847   | 44.928 | 48.251 |                                       |         |         |        |
| SPECT (n=250)               | 36 months | Primary      | 45.264              | 0.630   | 44.028 | 46.501 | -0.702                                | 0.705   | -2.085  | 0.681  |
|                             |           | BL*Time      | 45.260              | 0.630   | 44.023 | 46.497 | -0.708                                | 0.705   | -2.092  | 0.676  |
|                             |           | Mult. Imput. | 45.902              | 0.911   | 44.113 | 47.691 | -0.688                                | 0.740   | -2.143  | 0.766  |
| CG95 (2010) (n=137)         | 36 months | Primary      | 43.705              | 0.797   | 42.142 | 45.268 | -2.261                                | 0.850   | -3.930  | -0.592 |
|                             |           | BL*Time      | 43.724              | 0.797   | 42.160 | 45.288 | -2.244                                | 0.851   | -3.914  | -0.575 |
|                             |           | Mult. Imput. | 44.463              | 1.017   | 42.467 | 46.459 | -2.127                                | 0.863   | -3.823  | -0.432 |
| <b>Physical Functioning</b> |           |              |                     |         |        |        |                                       |         |         |        |
| CMR (n=332)                 | 12 months | Primary      | 60.088              | 1.901   | 56.356 | 63.819 |                                       |         |         |        |
|                             |           | BL*Time      | 60.119              | 1.901   | 56.388 | 63.851 |                                       |         |         |        |
|                             |           | Mult. Imput. | 61.328              | 2.676   | 56.082 | 66.574 |                                       |         |         |        |
| SPECT (n=301)               | 12 months | Primary      | 62.905              | 1.916   | 59.144 | 66.665 | 2.817                                 | 2.018   | -1.144  | 6.778  |
|                             |           | BL*Time      | 62.847              | 1.916   | 59.087 | 66.607 | 2.728                                 | 2.018   | -1.233  | 6.688  |
|                             |           | Mult. Imput. | 63.583              | 2.689   | 58.310 | 68.855 | 2.254                                 | 1.980   | -1.632  | 6.141  |
| CG95 (2010) (n=158)         | 12 months | Primary      | 56.132              | 2.400   | 51.422 | 60.841 | -3.956                                | 2.453   | -8.770  | 0.859  |
|                             |           | BL*Time      | 56.154              | 2.399   | 51.446 | 60.862 | -3.966                                | 2.452   | -8.778  | 0.846  |
|                             |           | Mult. Imput. | 57.595              | 3.069   | 51.574 | 63.615 | -3.734                                | 2.534   | -8.711  | 1.244  |
| CMR (n=282)                 | 36 months | Primary      | 61.741              | 2.027   | 57.764 | 65.719 |                                       |         |         |        |
|                             |           | BL*Time      | 61.758              | 2.029   | 57.776 | 65.740 |                                       |         |         |        |
|                             |           | Mult. Imput. | 63.310              | 2.708   | 58.000 | 68.621 |                                       |         |         |        |
| SPECT (n=250)               | 36 months | Primary      | 62.245              | 2.062   | 58.198 | 66.293 | 0.504                                 | 2.266   | -3.943  | 4.951  |
|                             |           | BL*Time      | 62.224              | 2.064   | 58.174 | 66.274 | 0.466                                 | 2.270   | -3.989  | 4.921  |
|                             |           | Mult. Imput. | 63.294              | 2.860   | 57.683 | 68.906 | -0.016                                | 2.230   | -4.396  | 4.364  |
| CG95 (2010) (n=137)         | 36 months | Primary      | 53.080              | 2.590   | 47.997 | 58.162 | -8.662                                | 2.732   | -14.023 | -3.300 |
|                             |           | BL*Time      | 53.127              | 2.592   | 48.040 | 58.214 | -8.631                                | 2.734   | -13.995 | -3.266 |
|                             |           | Mult. Imput. | 54.447              | 3.182   | 48.206 | 60.689 | -8.863                                | 2.632   | -14.029 | -3.696 |
| <b>Role Emotional</b>       |           |              |                     |         |        |        |                                       |         |         |        |

| Domain / randomised arm | Time      | Analysis     | Least-Squares Means |         |        |        | Least Squares Mean differences vs CMR |         |        |       |
|-------------------------|-----------|--------------|---------------------|---------|--------|--------|---------------------------------------|---------|--------|-------|
|                         |           |              | Est.                | Std Err | 95% CI |        | Est.                                  | Std Err | 95% CI |       |
|                         |           |              |                     |         | Lower  | Upper  |                                       |         | Lower  | Upper |
| CMR (n=332)             | 12 months | Primary      | 79.859              | 1.656   | 76.609 | 83.110 |                                       |         |        |       |
|                         |           | BL*Time      | 79.787              | 1.656   | 76.537 | 83.037 |                                       |         |        |       |
|                         |           | Mult. Imput. | 78.958              | 2.394   | 74.262 | 83.653 |                                       |         |        |       |
| SPECT (n=301)           | 12 months | Primary      | 82.806              | 1.669   | 79.531 | 86.082 | 2.947                                 | 1.773   | -0.532 | 6.427 |
|                         |           | BL*Time      | 82.877              | 1.669   | 79.602 | 86.151 | 3.090                                 | 1.775   | -0.393 | 6.573 |
|                         |           | Mult. Imput. | 81.650              | 2.326   | 77.089 | 86.212 | 2.692                                 | 1.773   | -0.789 | 6.173 |
| CG95 (2010) (n=158)     | 12 months | Primary      | 79.258              | 2.095   | 75.147 | 83.370 | -0.601                                | 2.154   | -4.828 | 3.627 |
|                         |           | BL*Time      | 79.267              | 2.095   | 75.157 | 83.378 | -0.519                                | 2.154   | -4.748 | 3.709 |
|                         |           | Mult. Imput. | 77.543              | 2.695   | 72.256 | 82.831 | -1.414                                | 2.269   | -5.872 | 3.044 |
| CMR (n=282)             | 36 months | Primary      | 80.165              | 1.737   | 76.757 | 83.574 |                                       |         |        |       |
|                         |           | BL*Time      | 80.402              | 1.736   | 76.994 | 83.809 |                                       |         |        |       |
|                         |           | Mult. Imput. | 79.056              | 2.529   | 74.092 | 84.021 |                                       |         |        |       |
| SPECT (n=250)           | 36 months | Primary      | 81.873              | 1.767   | 78.406 | 85.339 | 1.707                                 | 1.933   | -2.087 | 5.502 |
|                         |           | BL*Time      | 81.803              | 1.763   | 78.342 | 85.263 | 1.401                                 | 1.933   | -2.393 | 5.194 |
|                         |           | Mult. Imput. | 81.050              | 2.453   | 76.236 | 85.864 | 1.993                                 | 1.972   | -1.883 | 5.870 |
| CG95 (2010) (n=137)     | 36 months | Primary      | 76.949              | 2.213   | 72.606 | 81.292 | -3.216                                | 2.329   | -7.787 | 1.354 |
|                         |           | BL*Time      | 76.943              | 2.208   | 72.610 | 81.276 | -3.459                                | 2.325   | -8.021 | 1.104 |
|                         |           | Mult. Imput. | 76.124              | 2.817   | 70.594 | 81.654 | -2.932                                | 2.429   | -7.708 | 1.844 |
| <b>Role Performance</b> |           |              |                     |         |        |        |                                       |         |        |       |
| CMR (n=332)             | 12 months | Primary      | 70.748              | 1.775   | 67.265 | 74.231 |                                       |         |        |       |
|                         |           | BL*Time      | 70.736              | 1.775   | 67.253 | 74.219 |                                       |         |        |       |
|                         |           | Mult. Imput. | 74.126              | 2.517   | 69.191 | 79.061 |                                       |         |        |       |
| SPECT (n=300)           | 12 months | Primary      | 71.806              | 1.787   | 68.299 | 75.312 | 1.057                                 | 1.849   | -2.571 | 4.686 |
|                         |           | BL*Time      | 71.780              | 1.787   | 68.273 | 75.287 | 1.044                                 | 1.850   | -2.587 | 4.674 |
|                         |           | Mult. Imput. | 75.285              | 2.494   | 70.395 | 80.175 | 1.159                                 | 1.857   | -2.487 | 4.805 |
| CG95 (2010) (n=158)     | 12 months | Primary      | 68.123              | 2.223   | 63.760 | 72.486 | -2.625                                | 2.246   | -7.033 | 1.783 |
|                         |           | BL*Time      | 68.139              | 2.223   | 63.776 | 72.502 | -2.597                                | 2.247   | -7.006 | 1.812 |
|                         |           | Mult. Imput. | 72.025              | 2.827   | 66.481 | 77.568 | -2.101                                | 2.334   | -6.686 | 2.483 |
| CMR (n=282)             | 36 months | Primary      | 69.313              | 1.891   | 65.602 | 73.024 |                                       |         |        |       |

| Domain / randomised arm   | Time      | Analysis     | Least-Squares Means |         |        |        | Least Squares Mean differences vs CMR |         |        |       |
|---------------------------|-----------|--------------|---------------------|---------|--------|--------|---------------------------------------|---------|--------|-------|
|                           |           |              | Est.                | Std Err | 95% CI |        | Est.                                  | Std Err | 95% CI |       |
|                           |           |              |                     |         | Lower  | Upper  |                                       |         | Lower  | Upper |
| SPECT (n=250)             | 36 months | BL*Time      | 69.325              | 1.891   | 65.613 | 73.037 |                                       |         |        |       |
|                           |           | Mult. Imput. | 72.551              | 2.605   | 67.443 | 77.659 |                                       |         |        |       |
|                           |           | Primary      | 69.738              | 1.921   | 65.967 | 73.509 | 0.425                                 | 2.082   | -3.660 | 4.511 |
| CG95 (2010) (n=136)       | 36 months | BL*Time      | 69.697              | 1.921   | 65.926 | 73.468 | 0.372                                 | 2.083   | -3.716 | 4.460 |
|                           |           | Mult. Imput. | 72.844              | 2.721   | 67.505 | 78.183 | 0.294                                 | 2.094   | -3.821 | 4.409 |
|                           |           | Primary      | 64.447              | 2.405   | 59.727 | 69.168 | -4.866                                | 2.514   | -9.799 | 0.068 |
|                           |           | BL*Time      | 64.501              | 2.406   | 59.778 | 69.223 | -4.824                                | 2.514   | -9.758 | 0.109 |
|                           |           | Mult. Imput. | 68.379              | 3.021   | 62.451 | 74.306 | -4.172                                | 2.557   | -9.197 | 0.854 |
| <b>Social Functioning</b> |           |              |                     |         |        |        |                                       |         |        |       |
| CMR (n=332)               | 12 months | Primary      | 76.718              | 1.755   | 73.274 | 80.162 |                                       |         |        |       |
|                           |           | BL*Time      | 76.717              | 1.755   | 73.272 | 80.161 |                                       |         |        |       |
|                           |           | Mult. Imput. | 76.006              | 2.566   | 70.974 | 81.038 |                                       |         |        |       |
| SPECT (n=299)             | 12 months | Primary      | 76.300              | 1.767   | 72.833 | 79.768 | -0.418                                | 1.853   | -4.055 | 3.219 |
|                           |           | BL*Time      | 76.306              | 1.767   | 72.837 | 79.774 | -0.411                                | 1.854   | -4.050 | 3.227 |
|                           |           | Mult. Imput. | 75.816              | 2.553   | 70.808 | 80.823 | -0.190                                | 1.956   | -4.032 | 3.651 |
| CG95 (2010) (n=158)       | 12 months | Primary      | 75.409              | 2.208   | 71.075 | 79.742 | -1.309                                | 2.251   | -5.726 | 3.108 |
|                           |           | BL*Time      | 75.409              | 2.209   | 71.074 | 79.744 | -1.308                                | 2.252   | -5.727 | 3.111 |
|                           |           | Mult. Imput. | 74.463              | 3.028   | 68.519 | 80.407 | -1.543                                | 2.439   | -6.335 | 3.249 |
| CMR (n=278)               | 36 months | Primary      | 75.234              | 1.896   | 71.514 | 78.954 |                                       |         |        |       |
|                           |           | BL*Time      | 75.393              | 1.895   | 71.674 | 79.111 |                                       |         |        |       |
|                           |           | Mult. Imput. | 75.217              | 2.683   | 69.954 | 80.481 |                                       |         |        |       |
| SPECT (n=249)             | 36 months | Primary      | 75.049              | 1.925   | 71.271 | 78.827 | -0.185                                | 2.124   | -4.353 | 3.984 |
|                           |           | BL*Time      | 75.067              | 1.922   | 71.295 | 78.840 | -0.325                                | 2.121   | -4.487 | 3.837 |
|                           |           | Mult. Imput. | 74.616              | 2.665   | 69.388 | 79.844 | -0.602                                | 2.161   | -4.849 | 3.646 |
| CG95 (2010) (n=135)       | 36 months | Primary      | 73.742              | 2.426   | 68.981 | 78.502 | -1.492                                | 2.567   | -6.530 | 3.546 |
|                           |           | BL*Time      | 73.752              | 2.422   | 68.999 | 78.505 | -1.641                                | 2.563   | -6.669 | 3.388 |
|                           |           | Mult. Imput. | 73.650              | 3.156   | 67.454 | 79.847 | -1.567                                | 2.661   | -6.799 | 3.664 |
| <b>Vitality</b>           |           |              |                     |         |        |        |                                       |         |        |       |
| CMR (n=327)               | 12 months | Primary      | 50.747              | 1.592   | 47.623 | 53.871 |                                       |         |        |       |
|                           |           | BL*Time      | 50.819              | 1.593   | 47.693 | 53.944 |                                       |         |        |       |

| Domain / randomised arm | Time      | Analysis     | Least-Squares Means |         |        |        | Least Squares Mean differences vs CMR |         |        |       |
|-------------------------|-----------|--------------|---------------------|---------|--------|--------|---------------------------------------|---------|--------|-------|
|                         |           |              | Est.                | Std Err | 95% CI |        | Est.                                  | Std Err | 95% CI |       |
|                         |           |              |                     |         | Lower  | Upper  |                                       |         | Lower  | Upper |
| SPECT (n=296)           | 12 months | Mult. Imput. | 52.280              | 2.176   | 48.012 | 56.547 |                                       |         |        |       |
|                         |           | Primary      | 52.654              | 1.611   | 49.493 | 55.815 | 1.907                                 | 1.741   | -1.510 | 5.324 |
|                         |           | BL*Time      | 52.580              | 1.612   | 49.418 | 55.743 | 1.762                                 | 1.744   | -1.661 | 5.184 |
| CG95 (2010) (n=156)     | 12 months | Mult. Imput. | 54.107              | 2.237   | 49.718 | 58.496 | 1.827                                 | 1.748   | -1.605 | 5.259 |
|                         |           | Primary      | 51.135              | 2.028   | 47.154 | 55.115 | 0.387                                 | 2.111   | -3.755 | 4.530 |
|                         |           | BL*Time      | 51.183              | 2.028   | 47.202 | 55.164 | 0.364                                 | 2.111   | -3.778 | 4.506 |
| CMR (n=275)             | 36 months | Mult. Imput. | 52.951              | 2.625   | 47.797 | 58.104 | 0.671                                 | 2.250   | -3.752 | 5.093 |
|                         |           | Primary      | 49.353              | 1.664   | 46.087 | 52.619 |                                       |         |        |       |
|                         |           | BL*Time      | 49.347              | 1.667   | 46.076 | 52.619 |                                       |         |        |       |
| SPECT (n=248)           | 36 months | Mult. Imput. | 50.866              | 2.265   | 46.423 | 55.309 |                                       |         |        |       |
|                         |           | Primary      | 53.211              | 1.693   | 49.888 | 56.534 | 3.858                                 | 1.877   | 0.175  | 7.540 |
|                         |           | BL*Time      | 53.220              | 1.694   | 49.895 | 56.545 | 3.873                                 | 1.883   | 0.178  | 7.567 |
| CG95 (2010) (n=137)     | 36 months | Mult. Imput. | 54.926              | 2.295   | 50.423 | 59.429 | 4.060                                 | 1.880   | 0.365  | 7.755 |
|                         |           | Primary      | 50.046              | 2.118   | 45.889 | 54.203 | 0.693                                 | 2.250   | -3.722 | 5.108 |
|                         |           | BL*Time      | 50.061              | 2.119   | 45.902 | 54.220 | 0.714                                 | 2.251   | -3.703 | 5.131 |
|                         |           | Mult. Imput. | 51.661              | 2.612   | 46.534 | 56.787 | 0.795                                 | 2.280   | -3.688 | 5.277 |

Primary: fixed effects baseline value, time (categorical), randomised arm, arm-by-time interaction, age, sex, randomising centre, pre-test likelihood category.

Correlation handled by repeated measures within patients, unstructured covariance pattern.

BL\*Time: As for primary, but also including fixed effect for baseline\*time interaction.

## Appendix E: Supplementary analyses of Euroqol EQ-5D

Table E1: Overall distribution of observed EQ-5D-3L and EQ-5D-5L scale values, and frequency of floor/ceiling values at baseline, 12 and 36months follow-up. (Ranges: for -3L, -0.594= worst health. For -5L -0.281 = worst health. For both, 0=unconscious, 1=best health)

|                              | 3T CMR-Guided Care<br>(n=481) | SPECT-Guided Care<br>(n=481) | NICE CG95 (2010)<br>(n=240) | Total (n=1202)           |
|------------------------------|-------------------------------|------------------------------|-----------------------------|--------------------------|
| <b>EQ-5D-3L Utility</b>      |                               |                              |                             |                          |
| <b>Baseline</b>              |                               |                              |                             |                          |
| n                            | 466                           | 468                          | 230                         | 1164                     |
| Mean (SD)                    | 0.757 (0.222)                 | 0.743 (0.227)                | 0.728 (0.250)               | 0.746 (0.230)            |
| Median (Interquartile Range) | 0.796 ( 0.691 to 0.883 )      | 0.760 ( 0.689 to 0.848 )     | 0.743 ( 0.656 to 0.883 )    | 0.760 ( 0.689 to 0.850 ) |
| n (%) Min, Max value         | 0 (0.0%), 113 (24.2%)         | 0 (0.0%), 103 (22.0%)        | 0 (0.0%), 57 (24.8%)        | 0 (0.0%), 273 (23.5%)    |
| <b>12 months</b>             |                               |                              |                             |                          |
| n                            | 322                           | 295                          | 155                         | 772                      |
| Mean (SD)                    | 0.785 (0.260)                 | 0.776 (0.247)                | 0.746 (0.304)               | 0.774 (0.265)            |
| Median (Interquartile Range) | 0.812 ( 0.691 to 1.000 )      | 0.796 ( 0.691 to 1.000 )     | 0.796 ( 0.689 to 1.000 )    | 0.796 ( 0.691 to 1.000 ) |
| n (%) Min, Max value         | 0 (0.0%), 130 (40.4%)         | 0 (0.0%), 106 (35.9%)        | 0 (0.0%), 59 (38.1%)        | 0 (0.0%), 295 (38.2%)    |
| <b>36 months</b>             |                               |                              |                             |                          |
| n                            | 275                           | 247                          | 133                         | 655                      |
| Mean (SD)                    | 0.791 (0.250)                 | 0.756 (0.283)                | 0.741 (0.274)               | 0.767 (0.268)            |
| Median (Interquartile Range) | 0.848 ( 0.691 to 1.000 )      | 0.796 ( 0.689 to 1.000 )     | 0.796 ( 0.656 to 1.000 )    | 0.796 ( 0.689 to 1.000 ) |
| n (%) Min, Max value         | 0 (0.0%), 113 (41.1%)         | 0 (0.0%), 86 (34.8%)         | 0 (0.0%), 42 (31.6%)        | 0 (0.0%), 241 (36.8%)    |
| <b>EQ-5D-5L Utility</b>      |                               |                              |                             |                          |
| <b>Baseline</b>              |                               |                              |                             |                          |
| n                            | 468                           | 469                          | 231                         | 1168                     |
| Mean (SD)                    | 0.843 (0.161)                 | 0.831 (0.175)                | 0.817 (0.191)               | 0.833 (0.173)            |
| Median (Interquartile Range) | 0.879 ( 0.778 to 0.937 )      | 0.859 ( 0.777 to 0.937 )     | 0.859 ( 0.733 to 0.937 )    | 0.861 ( 0.777 to 0.937 ) |
| n (%) Min, Max value         | 0 (0.0%), 98 (20.9%)          | 0 (0.0%), 96 (20.5%)         | 0 (0.0%), 50 (21.6%)        | 0 (0.0%), 244 (20.9%)    |
| <b>12 months</b>             |                               |                              |                             |                          |
| n                            | 320                           | 295                          | 156                         | 771                      |
| Mean (SD)                    | 0.845 (0.205)                 | 0.843 (0.191)                | 0.829 (0.212)               | 0.841 (0.201)            |
| Median (Interquartile Range) | 0.922 ( 0.782 to 1.000 )      | 0.892 ( 0.777 to 1.000 )     | 0.887 ( 0.777 to 1.000 )    | 0.896 ( 0.777 to 1.000 ) |
| n (%) Min, Max value         | 0 (0.0%), 111 (34.7%)         | 0 (0.0%), 96 (32.5%)         | 0 (0.0%), 50 (32.1%)        | 0 (0.0%), 257 (33.3%)    |

|                              | 3T CMR-Guided Care<br>(n=481) | SPECT-Guided Care<br>(n=481) | NICE CG95 (2010)<br>(n=240) | Total (n=1202)           |
|------------------------------|-------------------------------|------------------------------|-----------------------------|--------------------------|
| <b>36 months</b>             |                               |                              |                             |                          |
| n                            | 278                           | 246                          | 135                         | 659                      |
| Mean (SD)                    | 0.850 (0.199)                 | 0.826 (0.219)                | 0.808 (0.221)               | 0.833 (0.212)            |
| Median (Interquartile Range) | 0.916 ( 0.779 to 1.000 )      | 0.887 ( 0.777 to 1.000 )     | 0.859 ( 0.745 to 1.000 )    | 0.892 ( 0.777 to 1.000 ) |
| n (%) Min, Max value         | 0 (0.0%), 110 (39.6%)         | 0 (0.0%), 70 (28.5%)         | 0 (0.0%), 38 (28.1%)        | 0 (0.0%), 218 (33.1%)    |

Table E2: Comparison of primary and sensitivity analyses of EQ5D-3L and EQ-5D-5L utilities analysed using mixed effects (random coefficients) models

| Domain / Analysis   | CG95 (2010) vs CMR |                |         |         | SPECT vs CMR |                |         |         |
|---------------------|--------------------|----------------|---------|---------|--------------|----------------|---------|---------|
|                     | Estimate           | Standard Error | 95% CI  |         | Estimate     | Standard Error | 95% CI  |         |
|                     |                    |                | Lower   | Upper   |              |                | Lower   | Upper   |
| <b>3L Utility</b>   |                    |                |         |         |              |                |         |         |
| Primary             | -0.0009            | 0.0007         | -0.0022 | 0.0004  | -0.0007      | 0.0006         | -0.0018 | 0.0004  |
| Baseline*Time       | -0.0009            | 0.0007         | -0.0022 | 0.0004  | -0.0007      | 0.0006         | -0.0018 | 0.0004  |
| Multiple Imputation | -0.0007            | 0.0007         | -0.0021 | 0.0007  | -0.0006      | 0.0006         | -0.0017 | 0.0006  |
| Proportional Odds   | -0.0108            | 0.0107         | -0.0317 | 0.0101  | -0.0097      | 0.0118         | -0.0328 | 0.0134  |
| <b>5L Utility</b>   |                    |                |         |         |              |                |         |         |
| Primary             | -0.0009            | 0.0005         | -0.0019 | 0.0001  | -0.0006      | 0.0004         | -0.0014 | 0.0001  |
| Baseline*Time       | -0.0009            | 0.0005         | -0.0019 | 0.0001  | -0.0006      | 0.0004         | -0.0014 | 0.0001  |
| Multiple Imputation | -0.0009            | 0.0005         | -0.0019 | 0.0002  | -0.0006      | 0.0004         | -0.0015 | 0.0003  |
| Proportional Odds   | -0.0157            | 0.0066         | -0.0286 | -0.0029 | -0.0111      | 0.0049         | -0.0208 | -0.0015 |

Estimate=Estimated interaction effect between NICE (or SPECT) and time in months. Negative values indicate CMR improving vs comparator, positive values indicate comparator improving vs CMR.

Lower/Upper = Limits of 95% Confidence Interval for the difference

Baseline\*Time=Fitting the primary analysis model, with an additional fixed interaction effect for baseline-by-time, allowing patients with different health statuses to have different trajectories during the follow-up.

Proportional Odds=Replacing linear mixed model with an ordinal proportional odds model, modelling the odds of moving up to greater values. Performed as an additional analysis, in light of the skewed distribution. Values <0 represent reduced log-odds per month of moving to higher scores for CG95/SPECT vs CMR, values >0 represent increased log-odds per month of moving up to higher scores vs CMR. Thus the estimate of -0.01571 for -5L Utility in the NICE comparison indicates that the odds of a NICE patient having a higher -5L Utility change by  $\exp(-0.0157) - 1 = -1.56\%$  per month compared to the CMR arm.



Table E3: Comparison of primary and sensitivity Repeated Measures (covariance pattern) modelling of EQ-5D-3L and EQ-5D-5L at 12 and 36months post-randomisation

| Domain / randomised arm       | Time      | Analysis     | Least-Squares Means |          |        |       | Least Squares Mean differences vs CMR |          |        |        |
|-------------------------------|-----------|--------------|---------------------|----------|--------|-------|---------------------------------------|----------|--------|--------|
|                               |           |              | Est.                | Std Err. | 95% CI |       | Est.                                  | Std Err. | 95% CI |        |
|                               |           |              |                     |          | Lower  | Upper |                                       |          | Lower  | Upper  |
| <b>3L Utility</b>             |           |              |                     |          |        |       |                                       |          |        |        |
| CMR (n=322)                   | 12 months | Primary      | 0.786               | 0.016    | 0.754  | 0.818 |                                       |          |        |        |
|                               |           | BL*Time      | 0.791               | 0.016    | 0.759  | 0.823 |                                       |          |        |        |
|                               |           | Mult. Imput. | 0.795               | 0.023    | 0.749  | 0.841 |                                       |          |        |        |
| SPECT (n=295)                 | 12 months | Primary      | 0.779               | 0.016    | 0.747  | 0.811 | -0.007                                | 0.017    | -0.041 | 0.028  |
|                               |           | BL*Time      | 0.782               | 0.016    | 0.750  | 0.814 | -0.008                                | 0.017    | -0.043 | 0.026  |
|                               |           | Mult. Imput. | 0.784               | 0.023    | 0.739  | 0.830 | -0.011                                | 0.018    | -0.046 | 0.024  |
| CG95 (2010) (n=155)           | 12 months | Primary      | 0.746               | 0.021    | 0.706  | 0.787 | -0.039                                | 0.021    | -0.081 | 0.002  |
|                               |           | BL*Time      | 0.751               | 0.020    | 0.711  | 0.791 | -0.040                                | 0.021    | -0.081 | 0.002  |
|                               |           | Mult. Imput. | 0.763               | 0.027    | 0.710  | 0.816 | -0.032                                | 0.021    | -0.074 | 0.010  |
| CMR (n=275)                   | 36 months | Primary      | 0.782               | 0.017    | 0.749  | 0.814 |                                       |          |        |        |
|                               |           | BL*Time      | 0.786               | 0.017    | 0.754  | 0.818 |                                       |          |        |        |
|                               |           | Mult. Imput. | 0.794               | 0.024    | 0.747  | 0.841 |                                       |          |        |        |
| SPECT (n=247)                 | 36 months | Primary      | 0.761               | 0.017    | 0.728  | 0.794 | -0.021                                | 0.018    | -0.056 | 0.015  |
|                               |           | BL*Time      | 0.765               | 0.017    | 0.732  | 0.797 | -0.021                                | 0.018    | -0.057 | 0.014  |
|                               |           | Mult. Imput. | 0.772               | 0.024    | 0.725  | 0.818 | -0.022                                | 0.018    | -0.057 | 0.013  |
| CG95 (2010) (n=133)           | 36 months | Primary      | 0.737               | 0.021    | 0.695  | 0.778 | -0.045                                | 0.022    | -0.088 | -0.002 |
|                               |           | BL*Time      | 0.741               | 0.021    | 0.700  | 0.782 | -0.045                                | 0.022    | -0.088 | -0.002 |
|                               |           | Mult. Imput. | 0.755               | 0.028    | 0.700  | 0.811 | -0.039                                | 0.022    | -0.082 | 0.005  |
| <b>5L (Crosswalk) Utility</b> |           |              |                     |          |        |       |                                       |          |        |        |
| CMR (n=320)                   | 12 months | Primary      | 0.801               | 0.014    | 0.773  | 0.829 |                                       |          |        |        |
|                               |           | BL*Time      | 0.804               | 0.014    | 0.776  | 0.831 |                                       |          |        |        |
|                               |           | Mult. Imput. | 0.791               | 0.020    | 0.752  | 0.831 |                                       |          |        |        |
| SPECT (n=295)                 | 12 months | Primary      | 0.796               | 0.014    | 0.768  | 0.824 | -0.005                                | 0.015    | -0.034 | 0.025  |
|                               |           | BL*Time      | 0.798               | 0.014    | 0.770  | 0.826 | -0.006                                | 0.015    | -0.035 | 0.024  |
|                               |           | Mult. Imput. | 0.786               | 0.020    | 0.746  | 0.825 | -0.006                                | 0.015    | -0.036 | 0.024  |
| CG95 (2010) (n=156)           | 12 months | Primary      | 0.769               | 0.018    | 0.734  | 0.804 | -0.032                                | 0.018    | -0.068 | 0.003  |

| Domain / randomised arm | Time      | Analysis     | Least-Squares Means |          |        |       | Least Squares Mean differences vs CMR |          |        |        |
|-------------------------|-----------|--------------|---------------------|----------|--------|-------|---------------------------------------|----------|--------|--------|
|                         |           |              | Est.                | Std Err. | 95% CI |       | Est.                                  | Std Err. | 95% CI |        |
|                         |           |              |                     |          | Lower  | Upper |                                       |          | Lower  | Upper  |
| CMR (n=278)             | 36 months | BL*Time      | 0.771               | 0.018    | 0.736  | 0.806 | -0.033                                | 0.018    | -0.068 | 0.003  |
|                         |           | Mult. Imput. | 0.763               | 0.024    | 0.716  | 0.811 | -0.028                                | 0.019    | -0.066 | 0.010  |
|                         |           | Primary      | 0.801               | 0.015    | 0.772  | 0.830 |                                       |          |        |        |
| SPECT (n=246)           | 36 months | BL*Time      | 0.803               | 0.015    | 0.775  | 0.832 |                                       |          |        |        |
|                         |           | Mult. Imput. | 0.787               | 0.020    | 0.747  | 0.827 |                                       |          |        |        |
|                         |           | Primary      | 0.775               | 0.015    | 0.746  | 0.804 | -0.026                                | 0.016    | -0.057 | 0.005  |
| CG95 (2010) (n=135)     | 36 months | BL*Time      | 0.777               | 0.015    | 0.748  | 0.806 | -0.026                                | 0.016    | -0.058 | 0.005  |
|                         |           | Mult. Imput. | 0.765               | 0.020    | 0.725  | 0.805 | -0.022                                | 0.015    | -0.052 | 0.007  |
|                         |           | Primary      | 0.756               | 0.018    | 0.720  | 0.792 | -0.045                                | 0.019    | -0.083 | -0.007 |
| 5L Utility              | 12 months | BL*Time      | 0.758               | 0.018    | 0.722  | 0.795 | -0.045                                | 0.019    | -0.083 | -0.007 |
|                         |           | Mult. Imput. | 0.752               | 0.026    | 0.702  | 0.803 | -0.035                                | 0.021    | -0.076 | 0.006  |
|                         |           | Primary      | 0.854               | 0.012    | 0.831  | 0.877 |                                       |          |        |        |
| CMR (n=320)             | 12 months | BL*Time      | 0.856               | 0.012    | 0.834  | 0.879 |                                       |          |        |        |
|                         |           | Mult. Imput. | 0.836               | 0.017    | 0.803  | 0.870 |                                       |          |        |        |
|                         |           | Primary      | 0.854               | 0.012    | 0.831  | 0.877 | 0.000                                 | 0.012    | -0.024 | 0.024  |
| SPECT (n=295)           | 12 months | BL*Time      | 0.856               | 0.012    | 0.833  | 0.879 | -0.000                                | 0.012    | -0.024 | 0.024  |
|                         |           | Mult. Imput. | 0.837               | 0.018    | 0.802  | 0.872 | 0.001                                 | 0.013    | -0.025 | 0.027  |
|                         |           | Primary      | 0.837               | 0.015    | 0.808  | 0.866 | -0.017                                | 0.015    | -0.046 | 0.012  |
| CG95 (2010) (n=156)     | 12 months | BL*Time      | 0.839               | 0.015    | 0.811  | 0.868 | -0.017                                | 0.015    | -0.046 | 0.012  |
|                         |           | Mult. Imput. | 0.829               | 0.019    | 0.792  | 0.867 | -0.007                                | 0.014    | -0.035 | 0.022  |
|                         |           | Primary      | 0.851               | 0.012    | 0.826  | 0.875 |                                       |          |        |        |
| CMR (n=278)             | 36 months | BL*Time      | 0.852               | 0.012    | 0.828  | 0.876 |                                       |          |        |        |
|                         |           | Mult. Imput. | 0.832               | 0.017    | 0.798  | 0.866 |                                       |          |        |        |
|                         |           | Primary      | 0.837               | 0.013    | 0.813  | 0.862 | -0.013                                | 0.014    | -0.040 | 0.013  |
| SPECT (n=246)           | 36 months | BL*Time      | 0.840               | 0.012    | 0.815  | 0.864 | -0.013                                | 0.014    | -0.039 | 0.014  |
|                         |           | Mult. Imput. | 0.818               | 0.018    | 0.783  | 0.854 | -0.014                                | 0.014    | -0.041 | 0.014  |
|                         |           | Primary      | 0.815               | 0.016    | 0.784  | 0.845 | -0.036                                | 0.016    | -0.068 | -0.004 |
| CG95 (2010) (n=135)     | 36 months | BL*Time      | 0.817               | 0.016    | 0.786  | 0.847 | -0.036                                | 0.016    | -0.068 | -0.003 |
|                         |           | Mult. Imput. | 0.802               | 0.021    | 0.761  | 0.842 | -0.030                                | 0.016    | -0.062 | 0.002  |
|                         |           | Primary      |                     |          |        |       |                                       |          |        |        |

Primary: fixed effects baseline value, time (categorical), randomised arm, arm-by-time interaction, age, sex, randomising centre, pre-test likelihood category.  
Correlation handled by repeated measures within patients, unstructured covariance pattern.

BL\*Time: As for primary, but also including fixed effect for baseline\*time interaction.
